# 1 Status-dependent aging rates in long- 2 lived, social mole-rats are shaped by HPA 3 stress axis

---

4 Arne Sahm<sup>1#</sup>, Steve Hoffmann<sup>1</sup>, Philipp Koch<sup>2</sup>, Yoshiyuki Henning<sup>3</sup>, Martin Bens<sup>4</sup>, Marco Groth<sup>4</sup>, Hynek  
5 Burda<sup>5,6</sup>, Sabine Begall<sup>5</sup>, Saskia Ting<sup>7</sup>, Moritz Goetz<sup>7</sup>, Paul Van Daele<sup>8</sup>, Magdalena Staniszewska<sup>9</sup>, Jasmin  
6 Klose<sup>9</sup>, Pedro Fragoso Costa<sup>9</sup>, Matthias Platzer<sup>1</sup>, Karol Szafranski<sup>2,\*</sup>, Philip Dammann<sup>3,10,\*</sup>

7 <sup>1</sup> Computational Biology Group, Leibniz Institute on Aging – Fritz Lipmann Institute, Jena, Germany.

8 <sup>2</sup> Core Facility Life Science Computing, Leibniz Institute on Aging – Fritz Lipmann Institute, Jena, Germany.

9 <sup>3</sup> Institute of Physiology, University of Duisburg-Essen, University Hospital Essen, Essen, Germany.

10 <sup>4</sup> Core Facility Sequencing, Leibniz Institute on Aging – Fritz Lipmann Institute, Jena, Germany.

11 <sup>5</sup> Department of General Zoology, Faculty of Biology, University of Duisburg-Essen, Essen, Germany.

12 <sup>6</sup> Department of Game Management and Wildlife Biology, Faculty of Forestry and Wood Sciences, Czech University of Life  
13 Sciences, Prague, Czech Republic.

14 <sup>7</sup> University Hospital, Institute of Pathology and Neuropathology, University of Duisburg-Essen, Essen, Germany.

15 <sup>8</sup> University of South Bohemia, Department of zoology Branišovská 1760, 370 05 České Budějovice, Czech Republic

16 <sup>9</sup> University Hospital, Department of Nuclear Medicine, University of Duisburg-Essen, Essen, Germany.

17 <sup>10</sup> University Hospital, Central Animal Laboratory, University of Duisburg-Essen, Essen, Germany.

18 # Corresponding author (email: arne.sahm@leibniz-fli.de)

19 \*shared senior authorship

## 20 Abstract

## 21 Background

22 Mole-rat families of the genus *Fukomys* consist of social categories that differ considerably in their life  
23 expectancy. In a typical family, only one pair is reproductively active. These animals, called breeders,  
24 reach twice the lifespan of non-breeders in captivity.

## 25 **Results**

26 We used RNA-seq to compare breeders' gene expression profiles across 15 tissues from both sexes in  
27 two *Fukomys* species against those of age-matched non-breeders. The gene found to be most affected  
28 was *SULT2A1*, whose gene product is well known to deactivate DHEA – a repeatedly proposed “anti-  
29 aging hormone”. The second most affected gene – again strongly down-regulated in breeders – was  
30 *MC2R*, which codes for the adrenocorticotrophic hormone (ACTH) receptor, the primary inducer of  
31 glucocorticoid production. In line with this, we found the expression of the target genes of the  
32 glucocorticoid receptor substantially altered, breeders exhibited lower weight gain, higher bone density,  
33 and stronger use of the IGF1/GH axis. In addition to the latter, several anabolic processes such as  
34 protein synthesis, myogenesis, and oxidative phosphorylation, were found to be up-regulated in  
35 breeders. Also, apoptosis, P53-signaling, proteasome activity, and the immune defense were elevated in  
36 breeders. While coagulation was down-regulated, steroid hormone biosynthesis shifted from  
37 glucocorticoid to sex steroid production.

## 38 **Conclusions**

39 Our results highlight the role of the hypothalamic–pituitary–adrenal stress axis in aging, confirm already  
40 known promising targets of aging research, and suggest new ones. The observed up-regulation of the  
41 IGF1/GH axis in longer-living breeders questions the extent to which findings from short-lived species  
42 can be transferred to longer-lived ones.

## 43 **Keywords**

44 lifespan, *Fukomys*, hypothalamic–pituitary–adrenal axis, ACTHR, ACTH, DHEA, IGF1, growth hormone,  
45 differential gene expression

## 46 **Background**

47 Most of our current understanding of the underlying mechanisms of aging comes from short-lived  
48 model species. It is, however, still largely unclear to what extent insights obtained from short-lived  
49 organisms can be transferred to long-lived species, such as humans [1, 2]. Comparative approaches,  
50 involving species with particularly long healthy lives and seeking the causative mechanisms that  
51 distinguish them from shorter-lived relatives try to overcome this limitation [3]. Many studies that  
52 involved organisms with particularly long lifespans, e.g., queens in social hymenoptera, birds, bats,  
53 African mole-rats, and primates, have produced findings that were not always congruent with  
54 established aging theories [1, 3-7].

55 Species comparisons, however, also have their limitations. Many observed differences between species  
56 with differing lifespans are influenced by phylogenetic constraints, eco-physiological differences, or  
57 both, rather than being causal for the species-specific differences in aging rate and longevity. Therefore,  
58 the results mentioned above would gain much more value if they could be confirmed or falsified in a  
59 system in which it is unnecessary to cross the species border, that is, in a species that contains easily  
60 distinguishable cohorts with high vs. low longevity.

61 Bimodal aging occurs naturally in the genus *Fukomys* from the rodent family Bathyergidae (African mole-  
62 rats). These animals live in families (often called colonies) of usually consisting of 9 to 16 individuals [8,  
63 9], although single families may occasionally grow considerably larger in some species [10, 11].

64 Regardless of group size, an established family typically consists of only one breeding pair (the founders  
65 of the family, often called king/queen) and their progeny from multiple litters (often called workers).  
66 Because of strict avoidance of incest [12], the progeny do not engage in sexual activity in the confines of  
67 their natal family, even after reaching sexual maturity. Hence, grown *Fukomys* families are characterized  
68 by a subdivision into breeders (the founder pair) and non-breeders (all other family members).

69 Interestingly, breeders reach the age of 20 years or more in captivity, whereas non-breeders usually die  
70 before their tenth birth date (Fig. 1A). This divergence of survival probabilities between breeders and  
71 non-breeders is found in all *Fukomys* species studied so far, irrespective of sex. Because no difference in  
72 diet or workload has been observed between breeders and non-breeders in captivity, status-specific  
73 changes of gene expression after the transition from non-breeder to breeder are considered the most  
74 likely explanation of the differing lifespans [13, 14].

75 In the wild, non-breeders must meet a member of another family by chance to ascend to breeder status;  
76 in captivity, the establishment of new breeder pairs is subject to human control. Allowing an animal to  
77 breed in captivity can be regarded as a simple experimental intervention that results in an extension of  
78 life expectancy of approximately 100%. This extension is far more than most experimental interventions  
79 in vertebrates can achieve e.g. by caloric restriction (e.g., [15]) or diets containing resveratrol or  
80 rapamycin (e.g., [16, 17]). Furthermore, this relative lifespan extension starts from a non-breeder  
81 lifespan that is already more than twice as long as that of the mammalian model organisms most widely  
82 used in aging research, such as mice or rats.

83 Until now, relatively few studies have addressed the potential mechanisms behind this natural status-  
84 dependency of aging in *Fukomys* sp. Contrary to the predictions of both the advanced glycation  
85 formation theory [18] and the oxidative stress theory of aging [19, 20], markers of protein cross-linking  
86 and -oxidation were surprisingly higher in breeders of Ansell's mole-rats (*F. anelli*) than in age-matched  
87 non-breeders [21]. On the other hand, in the Damaraland mole-rat (*F. damarensis*), oxidative damage to  
88 proteins and lipids was significantly lower in breeding females than in their non-reproductive  
89 counterparts [22], a finding that is compatible with the oxidative stress theory of aging. In good  
90 agreement with their overall longevity irrespective of social status, Ansell's mole-rats produce less  
91 thyroxine (T4) and recruit smaller proportions of their total T4 resources into the active unbound form

92 than do euthyroid mammals. Still, nonetheless the levels of unbound T4 (fT4) do not explain the  
93 intraspecific differences in aging rates between *F. anelli* breeders and non-breeders, because the levels  
94 of this hormone did not differ between the two cohorts [23]. Closely connected to the topic of this  
95 paper is the finding, that non-breeding giant mole-rats (*F. mechowii*) maintain fairly stable gene  
96 expression into relative old ages, quite in contrast to the shorter-lived Norway rat [24]. It is, however,  
97 still unclear what happens on the gene expression level when an individual attains breeding status.

98 Interestingly, a recent study by [7] found that the longest-lived rodent, the naked mole-rat  
99 *Heterocephalus glaber*, tended globally to show opposite changes in the transition from non-breeders to  
100 breeders compared to shorter-lived guinea pigs. *Heterocephalus* and *Fukomys* are similar in their mating  
101 and social behavior, but differences appear to exist regarding the effect of breeding on aging rates: until  
102 very recently, naked mole-rat non-breeders have been reported to be as long-lived as breeders [25, 26].  
103 In 2018, a lifespan advantage of breeders over non-breeders was reported in females (but not males),  
104 yet the divergence of the two groups appeared to be considerably smaller than in *Fukomys* [27] and  
105 underlying data is being debated [28]. In summary, status-dependent aging is either absent in  
106 *Heterocephalus* or less pronounced than in *Fukomys*.

107 In this paper, we make use of the bimodal aging pattern in two *Fukomys* species (*F. mechowii* and *F.*  
108 *micklei*, Fig. 1A) by comparing the gene expression profiles of breeders (n=24) and age-matched non-  
109 breeders (n=22) in 16 organs or their substructures (hereinafter referred to as tissues, Fig. S1, Fig. 1B).  
110 Our main aim was to identify genes and pathways whose transcript levels are linked to the status-  
111 dependent aging-rates and to relate these patterns to insights into aging research obtained in shorter-  
112 lived species.

## 113 Results

114 We measured gene expression differences between breeders and non-breeders in two African mole-rat  
115 species, *F. mechowii* and *F. micklei*. Altogether, we performed RNA-seq for 636 tissue samples  
116 covering 16 tissue types from both species, sexes, and reproductive states (breeders and non-breeders).  
117 Each of the four groups (male/female breeders/non-breeders) of each species consisted of 5 to 7  
118 animals (see [Tables S1 –S5](#) for sample sizes, animal data, and pairing schemes). For each tissue, we  
119 conducted a multi-factorial analysis of differentially expressed genes (DEGs): the analysis was based on  
120 the variables reproductive state, sex, and species. During this exercise, we focused on the differences  
121 between slower-aging breeders and faster-aging non-breeders. This approach increases our statistical  
122 power by giving us a four-fold increase of sample size in comparison to species- and sex-specific breeder  
123 vs. non-breeder analyses. At the same time, we can additionally reduce the number of false-positive  
124 DEGs by restricting the analysis to those breeding status-related genes that show the same direction in  
125 both sexes and both species. We deliberately focused on those genes to concentrate our study on  
126 universal mechanisms that hold for both sexes and species.

127 To globally quantify the transcriptomic differences between the reproductive states, we performed  
128 three analyses: clustering of the samples based on pairwise correlation, principal variant component  
129 analysis, and an overview of the number of DEGs between reproductive states in comparison to DEGs  
130 between species and sex. Clustering of the samples based on pairwise correlations showed a full  
131 separation of the two species at the highest cluster level ([Fig. S1](#)). Below that level, an almost complete  
132 separation according to tissues was observed. Within the tissue clusters, the samples did not show a  
133 clear-cut separation between sex or breeder/non-breeder status. Accordingly, a principal variance  
134 component analysis showed that species, tissue, and the combination of both variables accounted for  
135 98.4 % of the total variance in the data set; individual differences explained 1.4 % of the variance, and

136 only 0.004 % was explained by breeder/non-breeder status (Fig. 2A). Regarding the numbers of DEGs,  
137 we found – unsurprisingly considering the aforementioned facts –by far the highest number of DEGs in  
138 the species comparison (Fig. 2b). Although in almost every examined tissue the numbers of detected  
139 DEGs were also high between sexes, most tissues exhibited very few DEGs due to breeder/non-breeder  
140 status. Exceptions were liver, spleen, ovary and, especially, tissues of the endocrine system (adrenal  
141 gland, pituitary gland, thyroid), in which the number of DEGs between breeders and non-breeders  
142 ranged from more than sixty to several thousand.

143 Next, we evaluated the relevance of reproductive status DEGs for aging and aging-related diseases. For  
144 this analysis, we first determined overlaps by using the Digital Aging Atlas (DAA) – a database of genes  
145 that show aging-related changes in humans [29]. Across species and sexes, significant overlaps (FDR <  
146 0.05, Fisher’s exact test) with the DAA were found in three tissues: adrenal gland, ovary and pituitary  
147 gland (false discovery rate [FDR] = 0.005, each; Fig. 3A). Among these three endocrine tissues, the DEGs  
148 of the ovaries overlapped significantly with those from adrenal ( $p=2.8*10^{-27}$ ) and pituitary glands  
149 ( $p=0.005$ ), but there was no significant overlap between the two glands (Fig. 3A). Thus, together, we  
150 found indications for aging-relevant expression changes after the transition from non-breeders to  
151 breeders in three tissues of the endocrine system, which presumably affect separate aspects of aging in  
152 adrenal and pituitary glands.

153 Moreover, we compared the DEGs with respect to the reproductive status that we identified in *Fukomys*  
154 with regard to their direction to transcript-level changes observed in similar experiments using naked  
155 mole-rats and guinea pigs [7]. The direction of the status-dependent DEGs regulation in *Fukomys*, as  
156 found in this study, was significantly more often the same rather than opposite as in the naked mole-rat  
157 (females, 60 %,  $p=5.2*10^{-58}$ ; males, 62 %,  $p=10^{-44}$  for females, Fig.3B, Table S6). In the guinea pig, on the  
158 contrary, the *Fukomys* reproductive status DEGs were significantly more often regulated in the opposite

159 direction (females, 57 %,  $p=9*10^{-25}$ ; males, 59 %,  $p=4.7*10^{-23}$ , Fig. 3B, Table S6). Thus, at the single-gene  
160 level, the expression changes linked to reproductive status may affect lifespan differently in long-lived  
161 African mole-rats than in shorter-lived guinea pigs.

162 Beyond the single-gene level, we aimed to identify metabolic pathways and biological functions whose  
163 gene expression significantly depends on reproductive status. For this, we used Kyoto Encyclopedia of  
164 Genes and Genomes (KEGG) pathways [30], and Molecular Signatures Database (MSigDB) hallmarks [31]  
165 as concise knowledge bases. We used a known method that combines all p-values of genes in a given  
166 pathway in a threshold-free manner. The advantage of this approach is that it bundles the p-values from  
167 test results of individual gene expression differences at the level of pathways (see Methods section for  
168 details). Altogether, the gene expression of 55 KEGG pathways and 41 MSigDB hallmarks was  
169 significantly affected by reproductive status in at least one tissue (Fig. S3 and S4). Because the individual  
170 interpretation of each of these pathways/hallmarks would go beyond the scope of this study, we focus  
171 here on those 14 pathways and 13 hallmarks that were significantly different between breeders and  
172 non-breeders ( $FDR < 0.1$ ) in a global analysis across all tissues (Fig. 4). Because many pathways are  
173 driven mainly by gene expression in subsets of tissues, we weighted gene-wise the differential  
174 expression signals from the various tissues by the respective expression levels in the tissues. For  
175 instance, the expression level of the growth hormone (GH) gene *GH1* is known to be almost exclusively  
176 expressed in the pituitary glands. In our data set the *GH1* level of the pituitary gland accounted for 99.96  
177 % of the total *GH1* across all tissues. Accordingly, in pathways that contain *GH*, our weighted cross-tissue  
178 differential expression signal for this gene is almost exclusively determined by the pituitary gland. On  
179 the contrary, a differential expression signal of this gene in another tissue with a very low fraction of the  
180 gene's total expression would have almost no impact on the weighted cross-tissue level – even if that  
181 signal were very strong (see Methods section for details).



182 We found strong indications for increase in the activity of certain anabolic functions in breeders:  
183 Ribosomal protein expression (hsa03010 Ribosome, hsa03008 Ribosome biogenesis in eukaryotes, Fig.  
184 4A) was elevated in most tissues (and accordingly also in the weighted cross-tissue analysis). In MSigDB  
185 hallmarks, the strongest enrichment signal came from MYC targets (HALLMARK\_MYC\_TARGETS\_V1),  
186 which can largely be considered a reflection of enhanced ribosomal protein expression and the fact that  
187 MYC is a basal transcription factor up-regulating genes involved in protein translation ([32], Fig. 4B). In  
188 functional correspondence, we observed an increase in the expression of mitochondrial respiratory  
189 chain components (hsa00190 Oxidative Phosphorylation, HALLMARK\_OXIDATIVE\_PHOSPHORYLATION,  
190 Fig. 4A,B). We also found strong indications for increased protein degradation (hsa03050 PROTEASOME,  
191 Fig. 4A). This weighted cross-tissue signal was, in contrast to the situation regarding ribosomes, driven  
192 mainly by two tissue types: the adrenal gland and the gonads.

193 To examine whether the simultaneous up-regulation of the ribosome, proteasome, and oxidative  
194 phosphorylation is a coordinated regulation, we performed a weighted gene co-expression network  
195 analysis (WGCNA) [33] from our gene count data and examined the connectivity between pairs of those  
196 KEGG pathways flagged in the weighted cross-tissue analysis. We found that the expression of ribosomal  
197 genes (hsa03010) was significantly linked to those of ribosome biogenesis (hsa03008,  $FDR=4.59*10^{-3}$ ),  
198 oxidative phosphorylation (hsa00190,  $FDR=4.05*10^{-4}$ ), and proteasome (hsa03050,  $FDR=4.59*10^{-3}$ ),  
199 whereas no other examined pathway pair exhibited a significant connectivity (Fig. S5). Interestingly,  
200 ribosome, proteasome, and oxidative phosphorylation pathways also shared other characteristics of  
201 their differential expression signals: subtle fold-changes, that is, up-regulation of 3 to 9 % on average.  
202 Thus, statistically significant signals at the pathway level resulted from relatively small shifts in all genes  
203 of these pathways in a seemingly coordinated manner and across multiple tissues (Data S1). In addition,  
204 ribosome (hsa03010, in ovary), proteasome (hsa03050, in ovary and adrenal gland), and RNA-transport

205 (hsa03013, in adrenal gland) are enriched in those *Fukomys* status-dependent DEGs that show, in a  
206 similar experimental setting [7], the same direction in both naked mole-rat sexes and the opposite  
207 direction in both guinea pig sexes (FDR < 0.05, Fisher's exact test).

208 The myogenesis hallmark (Fig. 4B) was also found to be up-regulated in breeders. Expectedly, this  
209 weighted cross-tissue result was driven mainly by differential expression signals from muscle tissue:  
210 muscle from all tissues exhibited the lowest p-value (Fig. 4A), and 15 of 20 up-regulated genes that  
211 contributed most to the weighted cross-tissue differential myogenesis signal exhibited their highest  
212 expression in muscle. These genes were involved mainly in calcium transport or part of the fast-skeletal  
213 muscle-troponin complex (Data S1). A clear exception of this muscle-dominated expression is found in  
214 the gene that exhibited the highest relative contribution to the differential myogenesis signal, *insulin-*  
215 *like growth factor 1 (IGF1)*. This gene was found to be expressed most strongly in ovary and liver and  
216 was strongly up-regulated in the breeders' ovaries and adrenal glands (Table 1). *IGF1* codes for a well-  
217 known key regulator of anabolic effects such as cell proliferation, myogenesis, and protein synthesis [34,  
218 35] and has a tight functional relation to GH (gene: *GH1*) another key anabolic regulator upstream of  
219 *IGF1*; together, these factors form the so-called GH/IGF1 axis [36-41]. Also, *GH1* was strongly up-  
220 regulated in breeders in its known principal place of synthesis, the pituitary gland (Table 1).

221 With xenobiotic metabolism and TNF- $\alpha$ -signaling, two defense hallmarks were also found to be up-  
222 regulated in breeders by the weighted cross-tissue analysis (HALLMARK\_XENOBIOTIC\_METABLISM and  
223 HALLMARK\_TNFA\_SIGNALING\_VIA\_NFKB, Fig. 4B). The up-regulation of the reactive oxygen species  
224 (ROS) hallmark comprising genes coding for proteins that detoxify ROS  
225 (HALLMARK\_REACTIVE\_OXYGEN\_SPECIES\_PATHWAY, Fig. 4B) falls into a similar category.

226 Another interesting aspect that was found to be significantly altered in breeders is steroid hormone  
227 biosynthesis (hsa00140 Steroid hormone biosynthesis, Fig. 4A). In this case, both up- and down-

228 regulated genes were in the pathway, and their absolute fold-changes were roughly balanced. Steroid  
229 hormones, on the one hand, comprise sex steroids – because these hormones are important players in  
230 sexual reproduction, such differences should be expected given the experimental setup. On the other  
231 hand, the class of steroid hormones – corticosteroids – has regulatory functions in metabolism, growth,  
232 and the cardiovascular system, as well as in the calibration of the immune system and response to stress  
233 [42]. The most influential contributor to the differential pathway signal by far on the weighted cross-  
234 tissue level was *CYP11A1*, which codes for the (single) enzyme that converts cholesterol to  
235 pregnenolone. This is the first and rate-limiting step in steroid hormone synthesis [43]. Because  
236 *CYP11A1* was found to be up-regulated in breeders in its main places of synthesis – the gonads and the  
237 adrenal gland (Table 1) – it can be assumed that the total output of steroid hormone biosynthesis in  
238 breeders is increased. The pattern of up- and down-regulation on the KEGG pathway, however, suggests  
239 that sex steroids especially are produced at a higher rate in breeders whereas circulating levels of  
240 glucocorticoids – such as cortisol – should be lower than in non-breeders (Fig. S6; see also our discussion  
241 on ACTH-R below).

242 Finally, several pathways flagged by the weighted cross-tissue analysis seem to be derivatives of the  
243 above-mentioned differentially expressed pathways instead of representing altered functions on their  
244 own. For example, Huntington’s (hsa05016), Parkinson’s (hsa05012), and Alzheimer’s (hsa05010)  
245 diseases could, in principle, be interpreted as highly relevant for aging and lifespan. A closer inspection  
246 of these pathways reveals, however, that the genes of the mitochondrial respiratory chain – which is the  
247 core of the oxidative phosphorylation pathway – are in all three cases the main contributors to the  
248 respective differential expression signals (Fig. S7-S9, Data S1). Similarly, we see in the case of fat  
249 digestion (hsa04975 Fat digestion and absorption) that two of the three largest contributors to the  
250 differential expression signal of that pathway – *ABCG8* and *SCARB1* – are directly involved in the

251 transport of cholesterol [44, 45]. Therefore, it seems likely that this signal is an expression of the altered  
252 steroid hormone biosynthesis rather than indicating altered fat digestion.

253 Interestingly, three genes, which we had already mentioned as potential regulators during the pathway  
254 analysis, also appeared among the ten most clearly altered genes on the weighted cross-tissue level:  
255 *GH1*, *IGF1*, and *CYP11A1* (Table 1). The top two among these ten are *sulfotransferase family 2A member*  
256 *1 (SULT2A1)* and *melanocortin 2 receptor (MC2R)*. *SULT2A1* is the main catalyzer of the sulfonation of  
257 the steroid hormone dehydroepiandrosterone (DHEA) to its non-active form DHEA-S [46]. DHEA has  
258 repeatedly been proposed to be an “anti-aging hormone” because its levels are negatively associated  
259 with chronological aging [47-49]. We found that *SULT2A1* is strongly down-regulated in breeders’, liver  
260 which is also the main location of its enzymatic action. The second candidate, *MC2R*, encodes the  
261 adrenocorticotropin (ACTH)-receptor, which is the main inducer of glucocorticoid synthesis and a crucial  
262 component of the hypothalamic–pituitary–adrenal (HPA) axis [50]. In humans and many other  
263 mammals, prolonged glucocorticoid excess leads to Cushing’s syndrome. Affected individuals exhibit  
264 muscle weakness, immune suppression, impairment of the GH/IGF1 axis, higher risk of diabetes,  
265 cardiovascular disease (hypertension), osteoporosis, decreased fertility, depression, and weight gain [51,  
266 52]. The large overlap of these symptoms with those of aging could explain to some extent that  
267 Cushing’s syndrome patients exhibit considerably higher mortality rates [53]. We hypothesized that the  
268 increased expression of the ACTH receptor in *Fukomys* non-breeders can cause similar expression  
269 patterns and consequences (Fig. 5).

270 **Table 1.** Top ten genes regarding weighted cross-tissue differential expression signal.

|                                                          | Weighted cross-tissue |       |                  | Tissue with highest expression |                              |          |                  |
|----------------------------------------------------------|-----------------------|-------|------------------|--------------------------------|------------------------------|----------|------------------|
|                                                          | P-value               | FDR   | Log2-foldchange* | Tissue                         | % of cross-tissue Expression | FDR      | Log2-foldchange* |
| <b>SULT2A1</b>                                           | 0.00E+00              | 0.000 | -3.19            | Liver                          | 97.42                        | 5.27E-06 | -3.26            |
| <b>MC2R</b>                                              | 6.00E-06              | 0.046 | -0.53            | Adrenal gland                  | 89.53                        | 8.78E-05 | -0.56            |
| <b>INHA</b>                                              | 1.60E-05              | 0.081 | 1.57             | Ovary                          | 67.91                        | 1.54E-05 | 2.22             |
| INHA – tissue with 2 <sup>nd</sup> highest expression    |                       |       |                  | Testis                         | 27.61                        | 0.56     | 0.21             |
| <b>CYP11A1</b>                                           | 5.90E-05              | 0.224 | 0.61             | Ovary                          | 45.55                        | 5.49E-05 | 0.91             |
| CYP11A1 – tissue with 2 <sup>nd</sup> highest expression |                       |       |                  | Adrenal gland                  | 43.63                        | 1.48E-03 | 0.47             |
| <b>NLRP14</b>                                            | 1.17E-04              | 0.355 | -0.80            | Ovary                          | 68.98                        | 2.84E-05 | -1.25            |
| NLRP14 – tissue with 2 <sup>nd</sup> highest expression  |                       |       |                  | Testis                         | 18.67                        | 0.54     | 0.19             |
| <b>GH</b>                                                | 2.58E-04              | 0.618 | 0.45             | Pituitary gland                | 99.96                        | 1.99E-02 | 0.45             |
| <b>IGF1</b>                                              | 3.62E-04              | 0.618 | 0.59             | Ovary                          | 51.73                        | 1.20E-04 | 0.76             |
| IGF1 – tissue with 2 <sup>nd</sup> highest expression    |                       |       |                  | Liver                          | 36.28                        | 0.39     | 0.24             |
| <b>ZP4</b>                                               | 3.74E-04              | 0.618 | -1.16            | Ovary                          | 95.30                        | 1.99E-03 | -1.23            |
| <b>TCL1A</b>                                             | 5.33E-04              | 0.618 | -1.05            | Ovary                          | 90.12                        | 2.14E-03 | -1.18            |
| <b>PNLIPRP2</b>                                          | 5.69E-04              | 0.618 | 1.36             | Ovary                          | 76.08                        | 2.23E-03 | 1.65             |

271 \* Direction: breeder/non-breeder

272 Note – tissues are listed if they contribute at least 10% to cross-tissue expression

273 We tested this hypothesis (Fig. 5) by checking five of its key predictions. Altered *MC2R* expression (Fig.  
274 6A) coincides with higher cortisol levels in hair samples from non-breeding *F. mechowii* than in those  
275 from breeders of the same species (Begall et al., in prep.). Furthermore, glucocorticoids such as cortisol  
276 exert their effect by binding to the glucocorticoid receptor that, in turn, acts as a transcription factor for  
277 many genes [54]. We tested whether the expression of targets of the glucocorticoid-receptor (NR3C1)  
278 was significantly altered throughout our data using two gene lists [55]: about three hundred direct  
279 target genes of the receptor that were identified by chromatinimmunoprecipitation (i), and about 1300  
280 genes that were found to be differentially expressed depending on the presence or absence of  
281 exogenous glucocorticoid (ii). Both gene lists were found to be significantly affected by differential  
282 expression at the weighted cross-tissue level (i,  $p=0.001$ ; ii,  $p<10^{-9}$ ) as well as in 5 (i) and 8 (ii) single  
283 tissues (Table S7, S8). In line with our hypothesis, we observed that the weight gain in non-breeders

284 was, on average, twice as strong compared to the weight gain in breeders during the experiment  
285 ( $p=7.49 \times 10^{-3}$ , type II ANOVA, Fig. 6B). In addition, we found a subtle but significant influence of  
286 reproductive status on the density of the vertebrae: the vertebrae of breeders were slightly denser than  
287 those of age-matched non-breeders ( $p=0.03$  for vertebra T12 only, and  $p=0.01$  across all examined  
288 vertebrae L1, L2, and T12; ANOVA, Fig. 6C, Table S11).

## 289 Discussion

290 The vast lifespan differences between *Fukomys* breeders and non-breeders are, according to our RNA-  
291 seq data, associated with only subtle global pattern shifts in transcript levels. Concerning the tested  
292 explanatory variables (*Fukomys* species, sex, breeding status), we found by far the highest number of  
293 DEGs at the level of the species comparison. Although the number of DEGs between the sexes was  
294 comparably high in almost each examined tissue, only very few DEGs were found comparing breeders  
295 and non-breeders. One exception is the ovary, whose high number of DEGs corresponds well with the  
296 disparity in reproductive activity. Other exceptions are liver, spleen, and, especially, the tissues of the  
297 endocrine system (adrenal gland, pituitary gland, thyroid), in which the number of DEGs between  
298 breeders and non-breeders ranged from more than 100 to more than 2,500.

299 Changes in the gene expression of the endocrine system are well known to play an important role both  
300 in sexual maturation and in aging and the development of aging-associated diseases, e.g., diabetes and  
301 cardiovascular diseases [56-58]. This finding fits well with the observation of substantial changes in the  
302 endocrine system after the transition from non-breeders to breeders in the related naked mole-rat –  
303 one of the key results of a recent study in that species [7]. The dominance of differential expression in  
304 endocrine tissue is also plausible insofar as these tissues exert a strong control function for other tissues  
305 via hormone release.

306 Steroid hormone biosynthesis exhibits a bipartite pattern in breeders, with up-regulated sex steroid  
307 genes and a simultaneous down-regulation of corticosteroid synthesis genes. The former could be  
308 expected as a consequence of sexual activity in breeders. For aging, it is, however, interesting that  
309 *SULT2A1*, a gene that codes for the specialized sulfotransferase converting the sex steroid DHEA to its  
310 non-active form DHEA-S was found to be heavily down-regulated in breeders. DHEA is the most  
311 abundant steroid hormone; it serves as a precursor for sex steroid biosynthesis but also has various  
312 metabolic functions on its own [59, 60]. DHEA levels decrease continuously during the human aging  
313 process to an extent that favors it as an aging biomarker [61, 62]. As a result, an aggressive advertising  
314 of DHEA as "anti-aging hormone" in the form of dietary supplements could be observed in recent years  
315 [47-49, 60]. Despite conflicting experimental data from various animal studies and clinical trials, a  
316 positive effect of DHEA on human health is frequently considered to be likely in the literature. Large-  
317 scale and long-term studies, however, are still pending [47, 62, 63]. Interestingly, DHEA is not only  
318 described as an aging marker but also as a marker for clinically relevant glucocorticoid excess [64].

319 Regarding corticosteroid synthesis, we hypothesize that the regulation of adrenal gland *MC2R*, coding  
320 for the ACTH receptor, is likely to cause a considerable proportion of the overall observed expression  
321 patterns and of the lifespan extension in breeders (Fig. 5). As a critical component of the HPA axis, ACTH  
322 is a stress hormone that is produced by the pituitary gland and transported by the the blood to the  
323 adrenal cortex, where it binds to the ACTH receptor [65]. Subsequently, the ACTH receptor induces the  
324 synthesis of glucocorticoids [50], e.g., cortisol, which in turn cause immunosuppressive and various  
325 metabolic effects throughout the organism [66]. Although in many mammals (such as humans, dogs,  
326 and guinea pigs) glucocorticoid excess disorder, Cushing's syndrome, is caused by overproduction of the  
327 hormone ACTH. Our results for *Fukomys* suggest, that the increased levels of the ACTH receptor may  
328 lead to symptoms and expression patterns that could resemble some of molecular and phenotypic

329 aspects of this pathological condition (Fig. 5). Our hypothesis is supported by a number of confirmed  
330 downstream effects: the target genes of the glucocorticoid receptor are highly significantly affected by  
331 differential gene expression; non-breeder symptoms were similar to those of humans with abnormally  
332 elevated glucocorticoid levels: weight gain, decreases in bone density, and impairment of the GH/IGF1  
333 axis (Fig. 5, Fig.6). Interestingly, blocking of the ACTH receptor has been suggested as a treatment for  
334 human Cushing's syndrome [67].

335 We looked for evidence of a regulation upstream of the ACTH receptor. Given the known positive  
336 feedback loop between the ACTH receptor and its own ligand, decreased ACTH synthesis in breeders  
337 would have been an obvious explanation [68]. We found that the expression of the ACTH polypeptide  
338 precursor gene (*POMC*) is unchanged. However, also other post-transcriptional or post-translational  
339 mechanisms such as cleaving may influence the ACTH levels in breeders and non-breeders. Of those  
340 genes known to be involved in the regulation of *MC2R* [69, 70], we found that only *PRKAR1B* was  
341 differentially regulated in the adrenal gland. However, this gene codes for only one of 7 subunits of the  
342 involved protein kinase A. Alternative explanations could be that epigenetic modifications, other still  
343 unidentified regulators of the transcript level, or both, are responsible for the differential expression.

344 In the circulatory system, represented by blood and spleen, down-regulation of coagulation factors was  
345 observed in breeders. Because coagulation factors are known to be up-regulated during aging in humans  
346 mice, rats, and even fish, this can be interpreted as a sign of a more juvenile breeders' transcriptome  
347 [71, 72]. Furthermore, the activity of coagulation factors is associated with a higher risk of coronary  
348 heart disease [73]. However, we found no obvious histopathological lesions in the hearts or other  
349 organs (spleen, kidney, liver, lung) of non-breeders.. Therefore, if down-regulation of coagulation  
350 attenuates the aging process in *Fukomys*, it seems to exert its effect only, if at all, at a latter age not  
351 investigated here.



352 Two defense mechanisms were also found to be up-regulated in breeders: xenobiotic metabolism and  
353 TNF- $\alpha$ -signaling. Increased TNF- $\alpha$ -signaling often leads to the induction of apoptosis [74]. In line with  
354 this, we found that apoptosis and P53-signaling were also up-regulated in breeders. Apoptosis is  
355 considered an important anti-cancer mechanism [75, 76]. We hypothesize this to compensate  
356 cancerogenic effects of the anabolic alterations described above (especially the up-regulation of the  
357 GH/IGF1 axis). In line with this, our more than 30 years' breeding history with several *Fukomys* species in  
358 Germany and the Czech Republic suggests that breeders are as "cancer-proof" as non-breeders despite  
359 their much longer lifespan (own unpublished data and R. Šumbera, personal communication).

360 Many anabolic pathways are up-regulated in breeders across tissues: protein biosynthesis, myogenesis,  
361 and the GH/IGF1 axis. In line with this finding and with the fact that protein synthesis consumes 30 to  
362 40% of a cell's ATP budget [77], we observed increased expression of mitochondrial respiratory chain  
363 components, implying an increase in the capacity for cellular ATP production. On the other hand,  
364 protein degradation and clearance by the proteasome are also up-regulated in breeders. The fact that  
365 the expression of proteasomal genes is significantly linked to the genes of ribosome biogenesis and  
366 oxidative phosphorylation indicates that those processes influence, or even trigger, each other and  
367 hence are regulated in a coordinated manner in *Fukomys* mole-rats.

368 The results of differential expression of anabolic components such as the GH/IGF1 axis are surprising.  
369 They fall within a debate in aging research that has been highly controversial over time: based on the  
370 well-known fact that the expression and secretion of GH and IGF1 decline with age in humans and other  
371 mammals [78], Rudman *et al.* administered synthetic GH to elderly subjects in 1990, thereby reversing a  
372 number of aging-associated effects such as expansion of adipose mass [79]. This led to GH being  
373 celebrated as an anti-aging drug [36], including dubious commercial offers. Today's aging research, on  
374 the contrary, strongly assumes that the enhanced activity of the GH/IGF1 axis accelerates aging and that

375 its suppression could extend lifespan even in humans [80-82]. In addition to several studies of synthetic  
376 GH in humans yielding less convincing results than those of Rudman *et al.*, the main reasons for this turn  
377 are the results of studies on short-lived model organisms. From worms to mice, the impairment of the  
378 GH/IGF1 axis by genetic intervention consistently led to longer lifespans (Table 2), e.g., the up-regulation  
379 of Klotho - an IGF1 inhibitor - extended the mouse lifespan by as much as 30 % [83]. As with the  
380 impairment of the GH/IGF1 axis, reducing of protein synthesis by decreasing the expression of MYC, a  
381 basal transcription factor, extended the mouse lifespan by as much as 20 % [32] whereas the  
382 impairment of the respiratory chain by rotenone resulted in prolongation of the killifish lifespan by 15 %  
383 [84] (Table 2).

384 Therefore, it is astonishing that massive up-regulation of these anabolic key components accompanies a  
385 lifespan extension of approximately 100 % in long-lived mammals and potentially even contributes to it.  
386 Several points could help to resolve this apparent contradiction: First, the up-regulation of anabolic  
387 pathways and key genes is at least partially accompanied by the regulation of other mechanisms that  
388 could plausibly compensate for deleterious effects. For example, it is, widely assumed that the negative  
389 impact of enhanced protein synthesis on lifespan is to a large extent caused by the accumulation of  
390 damaged or misfolded proteins, that is also known to contribute to aging-associated neurodegenerative  
391 diseases [15, 85, 86]. Up-regulation of the proteasome, as we observed in breeders in a weighted cross-  
392 tissue approach and especially in endocrine tissues, is known to counteract these effects by clearing  
393 damaged proteins leading to lifespan extension in worm and fly [86]. Enhanced proteasome activity has  
394 also been linked with higher longevity of the naked mole-rat compared to the laboratory mouse [87, 88]  
395 and in comparative approaches across several mammalian lineages [89]. We hypothesize that the  
396 simultaneously high anabolic synthesis and catabolic degradation of proteins will lead to a higher  
397 protein turnover rate in breeders and, accompanied with that, a reduced accumulation of damaged and

398 misfolded proteins. Similarly, it seems plausible that the up-regulation of the mitochondrial respiratory  
399 chain (oxidative phosphorylation) in breeders is compensated for by simultaneous up-regulation of the  
400 reactive oxygen hallmark: the mitochondrial respiratory chain is the main source of cellular ROS which  
401 can damage DNA, proteins and other cellular components [90, 91]; the reactive oxygen hallmark  
402 consists by definition of genes that are known to be up-regulated in response to ROS treatments.  
403 Unsurprisingly, at least 25 % of these genes code for typical antioxidant enzymes such as thioredoxin,  
404 superoxide dismutase, peroxiredoxin, or catalase that can detoxify ROS. Furthermore, the known cancer  
405 promoting effects of an enhanced GH/IGF1 axis [36] could, to some extent, be compensated for by up-  
406 regulation of apoptosis and p53 signaling, because these are major mechanisms of cancer suppression  
407 [92]. More generally, potential lifespan-extending effects of moderate up-regulation of both the  
408 GH/IGF1 axis and ROS production can also be viewed in the light of the hormesis hypothesis [93], which  
409 postulates that mild stressors can induce overall beneficial adaptive stress responses. In line with these  
410 arguments, we found higher resting metabolic rates in breeders compared to non-breeders in *Fukomys*  
411 *anselli* [94], a species closely related to *F. micklei*.

412

**Table 2.** Behavior of important aging-relevant genes and pathways in this study.

| Gene/Pathway                            | Regulation in indicated direction and species can reduce lifespan | Regulation in indicated direction and species can extend lifespan      | Differentially expressed in this study in indicated tissues and direction* | Gene/Pathway is expressed mainly in the following tissues |
|-----------------------------------------|-------------------------------------------------------------------|------------------------------------------------------------------------|----------------------------------------------------------------------------|-----------------------------------------------------------|
| Growth hormone ( <i>GH1</i> )           | Mouse ↑ <sup>1</sup>                                              | Mouse ↓ <sup>2</sup> , Rat ↓ <sup>2</sup>                              | Pituitary gland ↑                                                          | Pituitary gland                                           |
| Insulin growth factor 1 ( <i>IGF1</i> ) | –                                                                 | Mouse ↓ <sup>2</sup>                                                   | Adrenal gland ↑, Ovary ↑                                                   | Liver, Ovary                                              |
| IGF1-receptor ( <i>IGF1R</i> )          | –                                                                 | Mouse ↓ <sup>1</sup> , Worm ↓ <sup>3</sup> , Fly ↓ <sup>3</sup>        | Adrenal gland ↓, Ovary ↓                                                   | Many                                                      |
| Klotho ( <i>KL</i> )                    | Mouse ↓ <sup>3</sup>                                              | Mouse ↑ <sup>3</sup> , Worm ↑ <sup>3</sup>                             | Ovary ↓                                                                    | Endocrine tissue, Kidney                                  |
| <i>SIRT1</i>                            | –                                                                 | Mouse ↑ <sup>6</sup> , Worm ↑ <sup>7</sup> , Fly ↑ <sup>7</sup>        | –                                                                          | All                                                       |
| <i>MYC</i>                              | –                                                                 | Mouse ↓ <sup>8</sup>                                                   | Thyroid ↑                                                                  | All                                                       |
| <i>mTOR</i>                             | –                                                                 | Mouse ↓ <sup>9</sup> , Worm ↓ <sup>9</sup> , Fly ↓ <sup>9</sup>        | Adrenal gland ↓                                                            | All                                                       |
| <i>PRKAA2</i> (AMPK)                    | –                                                                 | Worm ↑ <sup>9</sup>                                                    | –                                                                          | Many                                                      |
| <i>TP53</i>                             | Mouse ↑ <sup>11</sup> , Fly ↑ <sup>11</sup>                       | Worm ↓ <sup>11</sup> , Mouse ↑ <sup>11</sup> , Fly ↑ <sup>11</sup>     | –                                                                          | All                                                       |
| <i>SOD2</i>                             | –                                                                 | Worm ↓ <sup>10</sup> , Fly ↑ <sup>10</sup>                             | –                                                                          | All                                                       |
| <i>FOXO3</i>                            | Fly ↑ <sup>12</sup>                                               | –                                                                      | Ovary ↓, Adrenal gland ↓                                                   | All                                                       |
| Protein synthesis                       | –                                                                 | Mouse ↓ <sup>8</sup> , Worm ↓ <sup>9</sup> , Fly ↓ <sup>9</sup>        | Many ↑                                                                     | All                                                       |
| Proteasome                              | –                                                                 | Worm ↑ <sup>14</sup> , Fly ↑ <sup>14</sup>                             | Gonads ↑, Adrenal gland ↑                                                  | All                                                       |
| Lysosome                                | –                                                                 | Worm ↑ <sup>13</sup>                                                   | –                                                                          | All                                                       |
| Respiratory chain                       | –                                                                 | Worm ↓ <sup>15</sup> , Fly ↓ <sup>16</sup> , Killifish ↓ <sup>17</sup> | Gonads ↑, Adrenal gland ↑, Blood ↑, Spleen ↑                               | All                                                       |
| Apoptosis                               | Mouse ↑ <sup>11</sup> , Fly ↑ <sup>11</sup>                       | Worm ↓ <sup>11</sup> , Mouse ↑ <sup>11</sup> , Fly ↑ <sup>11</sup>     | Skin ↑, Pituitary gland ↑                                                  | All                                                       |

414 1 [36], 2 [78], 3 [95], 4 [96], 5 [97], 6 [98], 7 [99], 8 [32], 9 [17], 10 [100], 11 [101], 12 [102], 13 [103], 14  
415 [86], 15 [104], 16 [105], 17 [84]

416 \*Direction: breeder/non-breeder

417 \*\* Direction: old/young

418 – Either not affecting lifespan or not known to the best of our knowledge (column 1 and 2); no change  
419 (column 3)

420 A second point that could help to resolve this apparent contradiction concerns the time of intervention.

421 The transition from non-breeder to breeder takes place in adulthood, when by far the largest portion of

422 the growth process has already been completed. In contrast, genetic interventions aimed at prolonging

423 the lifespan by inhibiting the GH/IGFH1 axis (Table 2) usually affect the organisms throughout their

424 entire lifespan, including infancy and youth. Therefore, it is still under debate whether the up-regulation

425 of translation and anabolic processes by the GH/IGF1 axis independently enhances growth and aging or

426 enhances aging only secondarily as a consequence of accelerated growth [106]. Our results are an

427 argument for the latter.

428 A third point is the question of the transferability of knowledge obtained in one species to other species.

429 Most insights into current aging research originate from very short-lived model organisms (Table 2). It is

430 clear, on the other hand, that the observed effects of lifespan-prolonging interventions listed in Table 2

431 are by far the smallest in the model organisms with the relatively longest lifespans: mice and rats.

432 Compared to most other mammals, however, even mice and rats are short-lived. Given their body

433 weight and an often-used correlation between body weight and lifespan across mammals, their

434 observed maximum lifespan of about four years corresponds to only 51 % (for mice) and 32 % (for rats)

435 of the expected maximum lifespan. In contrast, humans can live as much as 463% as long as they would

436 be expected based on their body weight. This disparity makes them, given this particular model, the

437 most extreme known non-flying mammal species regarding maximum longevity residual [107].

438 According to current data, *Fukomys* mole-rats reach values of ca. 200 % and thus can be regarded to be

439 closer to humans than to mice or rats in this respect. It is currently unclear to what degree aging

440 mechanisms and lifespan-affecting interventions that were discovered in short-lived model species  
441 apply to organisms that are far more long-lived, as in our experiment (e.g. [1, 2]). It seems reasonable to  
442 hypothesize that specific interventions that prolong the lifespan of long-lived organisms may have no  
443 major effect in short-lived species, and vice versa. For example, it could be that changes suitable to  
444 prolong the life of species with a low cancer-risk (e.g., African mole-rats, blind mole rats) [26, 108, 109]  
445 would have no or only a marginal effect in laboratory mice, whose primary cause of natural death is  
446 cancer [110]. Therefore, it may also be possible that those gene expression patterns caused by our  
447 lifespan-extending intervention in *Fukomys* mole-rats but contradicting the current knowledge obtained  
448 from short-lived organisms may highlight differences in aging mechanisms between short-lived and  
449 long-lived species.

450 As a fourth perspective, one could interpret the down-regulation of the GH/IGF1 axis in non-breeders as  
451 a byproduct of the apparent up-regulation of the HPA axis in non-breeders, that may well be adaptive in  
452 itself. In the wild, non-breeding *Fukomys* mole-rats can maximize their inclusive fitness by either  
453 supporting their kin in their natal family or by founding a new family elsewhere. It has therefore been  
454 suggested that the shorter lives of non-breeders could be adaptive on the ultimate level if longevity  
455 were traded against some other fitness traits, such as competitiveness, to defend colonies against  
456 intruders or to enhance their chances for successful dispersal [13]. A constitutively more activated HPA  
457 stress axis is expected to offer advantages for both family defense and dispersal but it carries the risk of  
458 status-specific aging symptoms, such as muscle weakness, lower GH/IGF1 axis activity, lower bone  
459 density etc. in the long run [52]. This effect may become even more pronounced under laboratory  
460 conditions where grown non-breeders cannot decide to disperse even if they would like to.

461 However, even the down-regulation of the GH/IGF-axis may be adaptive in itself for non-breeders if it  
462 has the potential to protect them from further damage. Note that for today's conventional view that

463 stronger activation of the GH/IGF1 axis accelerates aging (Table 2), it is generally challenging that  
464 decreasing activity is well documented to correlate with chronological age in a wide range of mammals,  
465 including mice, rats, dogs, and humans [78]. Also, decreasing activity correlates, under pathologic  
466 conditions such as Cushing's syndrome, with many symptoms akin to aging (Fig. 5). It has been  
467 suggested that one solution to this apparent contradiction may be that the GH/IGF1 axis is  
468 adaptively down-regulated in aging organisms as a reaction to already accumulated aging-related  
469 symptoms so that additional damage can be avoided [111, 112].

470 Finally, recent findings of positively selected genes in African mole-rats (family Bathyergidae, containing  
471 also *Fukomys* and *Heterocephalus*) could partly explain some of the surprising results. It is striking that  
472 translation, and oxidative phosphorylation were among the strongest differentially expressed molecular  
473 processes concerning the breeding status. Earlier, these processes were also reported to be the most  
474 affected by positive selection in the phylogeny of African mole-rats [113]. Furthermore, *IGF1* was one of  
475 thirteen genes that were found to be under positive selection in the last common ancestor of the mole-  
476 rats. This may indicate that the corresponding mechanisms were evolutionarily adapted to be less  
477 detrimental and make their up-regulation more compatible with a long lifespan. Since the mere fact of  
478 positive selection does not permit to draw conclusions about the direction of the mechanistic effect, this  
479 hypothesis, however, needs to remain speculative.

## 480 **Conclusions**

481 We performed a comprehensive transcriptome analysis that, for the first time within mammalian  
482 species, compared naturally occurring cohorts of species with massively diverging aging rates. The  
483 comparison of faster-aging *Fukomys* non-breeders with similar animals that were experimentally  
484 elevated to the slower-aging breeder status revealed by far the most robust transcriptome differences

485 within endocrine tissue: adrenal gland, ovary, thyroid, and pituitary gland. Genes and pathways involved  
486 in anabolism, such as *GH*, *IGF1*, translation and oxidative phosphorylation, were differentially expressed.  
487 Their inhibition is among the best-documented life-prolonging interventions in a wide range of short-  
488 lived model organisms (Table 2). Surprisingly, however, we found that the expression of these  
489 mechanisms was consistently higher in slower-aging breeders than in faster-aging non-breeders. This  
490 indicates that even basic molecular mechanisms of the aging process known from short-lived species  
491 cannot easily be transferred to long-lived species. In particular, this applies to the role of the GH/IGF1  
492 axis, which has in recent years been unilaterally described as harmful [81, 82, 106]. In addition, special  
493 features of the mole-rats could also contribute to the explanation of the unexpected result that genes  
494 and processes differentially expressed between reproductive statuses were also strongly altered during  
495 the evolution of the mole-rats [113]. Another intriguing possibility is that, in line with the hormesis  
496 hypothesis [93], moderate harmful effects of anabolic processes can be hyper-compensated for by up-  
497 regulation of pathways such as proteasomes, P53-signaling and antioxidant defense against ROS that we  
498 observed in slower-aging breeders as well.

499 Furthermore, our work provides evidence that the HPA stress axis is a key regulator for the observed  
500 downstream effects, including the lifespan difference. The effects are likely to be triggered by  
501 differential expression of the gene *MC2R* coding for the ACTH receptor resulting in an altered stress  
502 response in breeders vs. non-breeders. This is supported by the fact that cortisol levels in the non-  
503 breeders are elevated. Furthermore, the set of direct and indirect target genes of the glucocorticoid  
504 receptors is strongly affected by differential expression, and numerous known downstream effects of  
505 glucocorticoid excess have been demonstrated for non-breeders, such as muscle weakness, weight gain,  
506 and GH/IGF1 axis impairment. Overall, this evidence suggests that *MC2R* and other genes along the  
507 described signalling pathway are promising targets for possible interventions in aging research.



## 508 **Methods**

### 509 **Animal care and sampling**

510 All animals were housed in glass terraria with dimensions adjusted to the size of the family (min. 40 cm ×  
511 60 cm) in the Department of General Zoology, Faculty of Biosciences, University of Duisburg-Essen. The  
512 terraria are filled with a 5 cm layer of horticultural peat or sawdust. Tissue paper strips, tubes, and solid  
513 shelters were provided as bedding/nesting materials and environmental enrichment. Potatoes and  
514 carrots are supplied ad libitum as stable food, supplemented with apples, lettuce, and cereals. *Fukomys*  
515 mole-rats do not drink free water. Temperature was kept fairly constant at  $26 \pm 1$  °C, and humidity, at  
516 approximately 40 %. The daily rhythm was set to 12 hours darkness and 12 hours light.

517 New breeder pairs (new families) were established between March and May 2014. Each new family was  
518 founded by two unfamiliar, randomly chosen adult non-breeders of similar age (min/max/mean:  
519 1.56/6.5/3.58 years in *F. mechowii*; 1.8/5.4/3.1 years in *F. micklei*) and opposite sex and were taken  
520 from already existing separate colonies. These founder animals were moved to a new terrarium in  
521 which they were permanently mated. In both species, more than 80 % of these new pairs reproduced  
522 within the first 12 months (total number of offspring by the end of the year 2016, 82 *F. micklei* and 81  
523 *F. mechowii*). Only founders with offspring were subsequently assigned to the breeder cohort; founders  
524 without offspring were excluded from the study. Non-breeders remained in their natal family together  
525 with both parents and other siblings.

526 *F. mechowii* were sampled in five distinct sampling sessions between March 2015 and winter  
527 2016/2017. *F. micklei* were sampled in three distinct sampling sessions between November 2016 and  
528 July 2017. In both species, females were killed 4 to 6 months later than their male mates to ensure that

529 these breeder females were neither pregnant nor lactating at the time of sampling, in order to exclude  
530 additional uncontrolled variables.

531 Before sampling, animals were anaesthetized with 6 mg/kg ketamine combined with 2.5 mg/kg xylazine  
532 [114]. Once the animals lost their pedal withdrawal reflex, 1 to 2 ml of blood was collected by cardiac  
533 puncture, and the animals were killed by surgical decapitation. Blood samples (100 µl) were collected in  
534 RNAprotect Animal Blood reagent (Qiagen, Venlo, Netherlands). Tissue samples –hippocampus,  
535 hypothalamus, pituitary gland, thyroid, heart, skeletal muscle (M. quadriceps femoris), lateral skin, small  
536 intestine (ileum), upper colon, spleen, liver, kidney, adrenal gland, testis, and ovary – were transferred  
537 to RNeasy Protect Animal Blood reagent (Qiagen, Venlo, Netherlands) immediately after dissection and, following incubation, were  
538 stored at -80°C until analysis.

539 Animal housing and tissue collection were compliant with national and state legislation (breeding  
540 allowances 32-2-1180-71/328 and 32-2-11-80-71/345; ethics/animal experimentation approval 84–  
541 02.04.2013/A164, Landesamt für Natur-, Umwelt- und Verbraucherschutz Nordrhein-Westfalen).

## 542 **RNA preparation and sequencing**

543 For all tissues except blood, RNA was purified with the RNeasy Mini Kit (Qiagen) according to the  
544 manufacturer’s protocol. Blood RNA was purified with the RNeasy Protect Animal Blood Kit (Qiagen).  
545 Kidney and heart samples were treated with proteinase K before extraction, as recommended by the  
546 manufacturer. Library preparation was performed using the TruSeq RNA v2 kit (Illumina, San Diego, USA)  
547 which includes selection of poly-adenylated RNA molecules. RNA-seq was performed by single-end  
548 sequencing with 51 cycles in high-output mode on a HiSeq 2500 sequencing system (Illumina) and with  
549 at least 20 million reads per sample, as described in [Table S9](#). Read data for *F. mechowii* and *F. micklei*  
550 were deposited as European Nucleotide Archive study with the ID PRJEB29798 ([Table S9](#)).

## 551 **Read mapping and quantification**

552 It was ensured for all samples that the results of the respective sequencing passed “per base” and “per  
553 sequence” quality checks of FASTQC [115]. The reads were then mapped against previously published  
554 and with human gene symbols annotated *F. mechowii* and *F. micklei* transcriptome data [24, 113]. For  
555 both species, only the longest transcript isoform per gene was used; this is the method of choice for  
556 selecting a representative variant in large-scale experiments [116] ([Data S2, S3](#)). This selection resulted  
557 in 15,864 reference transcripts (genes) for *F. mechowii* and in 16,400 for *F. micklei*. After mapping and  
558 quantification, we further analyzed only those reference transcripts whose gene symbols were present  
559 in the transcript catalogs of both species – this was the case for 15,199 transcripts (the size of the union  
560 was 17,065). As mapping algorithm “bwa aln” of the Burrows-Wheeler Aligner (BWA) [117] was used,  
561 allowing no gaps and a maximum of two mismatches in the alignment. Only those reads that could be  
562 uniquely mapped to the respective gene were used for quantification. Read counts per gene and sample  
563 can be found in [Data S4](#). As another check, we ensured that all samples exhibited a Pearson correlation  
564 coefficient of at least 90% in a pairwise comparison based on log<sub>2</sub>-transformed read counts against all  
565 other samples of the same experimental group as defined by samples that were equal in the tissue as  
566 well as the species, sex, and reproductive status of the source animal.

## 567 **Differentially expressed genes analysis**

568 P-values for differential gene expression and fold-changes were determined with DESeq2 [118] and a  
569 multi-factorial design. The DESeq2-algorithm also includes strict filtering based on a normalized mean  
570 gene count that makes further pre-filtering unnecessary [118]. Therefore, those genes whose read count  
571 was zero for all examined samples were removed before further analysis, thereby reducing the number  
572 of analyzed genes to 15,181. The multi-factorial design means that, separately for each tissue, we input  
573 the read count data of samples across species, sex, and reproductive status into DESeq2 for each

574 sample. This allowed DESeq2 to perform DEG-analysis between the two possible states of each of the  
575 variables by controlling for additional variance in the other two variables. This approach resulted in a  
576 four-times higher sample size than with an approach that would have been based on comparisons of  
577 two experimental groups, each of which would be equal in tissue, species, sex, and reproductive status.  
578 It is known that the statistical power in RNA-seq experiments can increase considerably with sample size  
579 [119]. P-values were corrected for multiple testing with the Benjamini-Hochberg correction [120] (false  
580 discovery rate – FDR).

581 The results of the DEG-analysis can be found in [Data S5-S7](#).

## 582 **Enrichment analysis on pathway and cross-tissue level**

583 Let  $(p_1^t, \dots, p_n^t)$  represent the p-values obtained from differential gene expression analysis in the tissue  
584 corresponding with index  $t$  and the indices  $1, \dots, n$  corresponding to the examined genes. Furthermore,  
585 let  $(p_{x_1}^t, \dots, p_{x_m}^t)$ , with  $1 \leq x_i \leq n$  and  $1 \leq i \leq m$ , represent the p-values of genes with the indices  
586  $X = (x_1, \dots, x_m)$  belonging to a corresponding pathway that is tested for enrichment of differential  
587 expression signals. To determine the enrichment p-values at the pathway-level, we calculated the test  
588 statistic  $\mathcal{F}_X^t$  for the gene indices  $X$  in tissue index  $t$  according to Fisher's method for combining p-values  
589 also known as Brown's method:

$$\mathcal{F}_X^t = -2 * \sum_{i=1}^m \log_e(p_{x_i}^t)$$

590 Because p-values at the gene level were, as is common in RNA-seq experiments [121], not equally  
591 distributed, we empirically estimated the null distribution of the test statistic for each pathway instead  
592 of using the  $\chi^2$ -distribution as frequently suggested in the literature [122-124]. This was done by  
593 calculating  $\mathcal{F}_{X^j}^t$  for 1,000 random drawings, each without replacement,  $X^j = (x_1^j, \dots, x_m^j)$ , with

594  $1 \leq x_k^j \leq n$ ,  $1 \leq j \leq 1000$ . If the resulting p-value was zero (meaning  $\forall 1 \leq j \leq 1000: \mathcal{F}_X^t > F_{X^j}^t$ ), the  
595 procedure was repeated with 10,000 and 100,000 random drawings, respectively. In addition, the  
596 indices  $X$  were divided into  $X_{up}$  and  $X_{down}$ , depending on whether their fold-change was  $> 1$  or  $< 1$  in  
597 breeder vs. non-breeder comparison, and  $\mathcal{F}_{X_{up}}^t$  and  $\mathcal{F}_{X_{down}}^t$  calculated. The ratio  $\frac{\mathcal{F}_{X_{up}}^t}{\mathcal{F}_{X_{down}}^t}$  was used as an  
598 indicator for functional up- or down-regulation of the corresponding pathway (Fig. 4, Fig. S3, S4). Using  
599 this approach, enrichment p-values were estimated for all KEGG-pathways [30] and MSigDB-hallmarks  
600 [31], as well as across all examined tissues (Data S8, S9). In addition, the procedure was applied to test  
601 whether the known 300 direct and 1300 indirect glucocorticoid receptor target genes [55] were  
602 enriched for status-dependent differential expression signals (Tables S7, S8).

603 Similarly, cross-tissue DEG-p-values were weighted with a modified test statistic (c.f. [125]). Given the  
604 definitions from above, we calculated the weighted cross-tissue test statistic  $\mathcal{F}^g$  for the gene  $g$  as  
605 follows:

$$\mathcal{F}^g = |2 * \sum_{t=1}^l (\log_e(p_g^t) * w_g^t)|$$

606 with  $w_g^t = \frac{\overline{expr}_g^t * sgn(\log FC_g^t)}{\sum_{t=1}^l \overline{expr}_g^t}$

607 where  $\log FC_g^t$  and  $\overline{expr}_g^t$  are the logarithmized fold-change between reproductive states and  
608 normalized mean expression (across sexes, species, and reproductive status) for the gene with index  $g$   
609 and tissue with index  $t$  – both calculated by DESeq2 [118] –,  $sgn$  is the signum function, and  $l$  is the  
610 number of examined tissues. The reasoning for using this test statistic was as follows: For the weighted  
611 cross-tissue analysis, we assumed that the gene serves the same function throughout the entire  
612 organism. Therefore, the test statistic given above weights the p-values of the various tissues by the

613 respective expression levels in those tissues. This ensures that, weighting e. g., a ubiquitously expressed  
614 genes such as *TP53* is relatively equally across tissues, whereas for typical steroid hormone-biosynthesis  
615 genes, such as *CYP11A1*, the endocrine tissue results determine almost exclusively the weighted cross-  
616 tissue p-value. Furthermore, the test statistic rewards, based on the mentioned assumption, consistency  
617 in the direction of gene regulation throughout tissues. All calculated values for  $\log FC_g^t$ ,  $\overline{expr}_g^t$ ,  $p_g^t$ , as  
618 well as the resulting  $F^g$  and p-values, can be found in [Data S10](#).

619 Finally, weighted cross-tissue enrichment p-values at the pathway level were estimated by applying the  
620 above-described method at the pathway level (based on test statistic  $\mathcal{F}$ ) to the gene level weighted  
621 cross-tissue p-values.

622 P-values were corrected for multiple testing with the Benjamini-Hochberg correction [120] (FDR).

## 623 **Weighted gene co-expression network analysis**

624 We used the WGCNA R package to perform weighted correlation network analysis [33] of all 636  
625 samples at once. We followed the authors' usage recommendation by choosing a soft power threshold  
626 based on scale-free topology and mean connectivity development (we chose power=26 with a soft  $R^2$  of  
627 0.92 and a mean connectivity of 38.6), using biweight midcorrelation, setting maxPOutliers to 0.1, and  
628 using "signed" both as network and topological overlap matrix type. The maximum block size was  
629 chosen such that the analysis was performed with a single block and the minimum module size was set  
630 to 30. The analysis divided the genes into 26 modules, of which 5 were enriched for reproductive status  
631 DEGs based on Fisher's exact test and an FDR threshold of 0.05. Those 5 modules were tested for  
632 enrichment among KEGG-pathways [30] with the same test and significance threshold ([Table S10](#)). In  
633 addition, module eigengenes were determined and clustered ([Table S10](#)). Then the topological overlap  
634 matrix that resulted from the WGCNA analysis ( $TOM = [tom_{i,j}]$ , where the row indices  $1 \leq i \leq$

635 |*examined genes*| correspond to genes and the column indices  $1 \leq j \leq |*examined samples*|$   
636 correspond to samples) was used to determine pairwise connectivity between all KEGG-pathways that  
637 showed differential expression at the weighted cross-tissue level (Fig. S5). Based on the definition of  
638 connectivity of genes in a WGCNA analysis [33], we defined the connectivity between two sets of indices  
639  $X$  and  $Y$  each corresponding to genes as  $k_{X,Y} = \sum_{x \in X \setminus Y} \sum_{y \in Y \setminus X} tom_{x,y}$ . P-values for the connectivities  
640 were determined against null distributions that were empirically estimated by determining for each pair  
641  $X$  and  $Y$  the connectivities of 10,000 pairs of each  $|X|$  and  $|Y|$  randomly drawn indices (without  
642 replacement), respectively. Since “signed” was used as the network and topological overlap matrix type,  
643 the tests were one-sided.

## 644 Other analysis steps

645 Hierarchical clustering (Fig. S2) was performed based on Pearson correlation coefficients of  $\log_2$ -  
646 transformed read counts between all sample pairs using the complete-linkage method [126]. The  
647 principal variant component analysis (Fig. 2A) was performed with the pvca package from Bioconductor  
648 [127] and a minimum demanded percentile value of the amount of the variabilities, that the selected  
649 principal components needs to explain, of 0.5. Enrichments of DEGs among genes enlisted in the Digital  
650 Aging Atlas database ([29], Data S11) were determined with Fisher’s exact test, the Benjamini-Hochberg  
651 method (FDR) [120] for multiple test correction, and a significance threshold of 0.05. Pathway  
652 visualization (Fig. S6-S9) was performed with Pathview [128]. For the direction analysis of *Fukomys*  
653 reproductive status DEGs in previous experiments in naked-mole rats and guinea pigs, we examined  
654 those 10 tissues that were examined in all species (Table S6, Data S12). Separately for each tissue and  
655 combination of species – naked mole-rat or guinea pig – and sex, we determined how many *Fukomys*  
656 reproductive status DEGs were up-regulated or down-regulated. We also performed two-sided binomial  
657 tests on each of these number pairs with a hypothesized success probability of 0.5. Furthermore, for

658 each combination of species and sex, two-sided exact binomial tests using 0.5 as parameter were  
659 performed based on the sums of up-regulated and down-regulated genes across tissues (Table S6). For  
660 enrichment analysis of direct and indirect glucocorticoid receptor target genes, mouse mRNA RefSeq IDs  
661 from Phuc Le et al. [55] were translated to human Entrez IDs and gene symbols via Ensembl Biomart  
662 (Data S13). To statistically analyze the weight gain of the animals during the experiment, we used a type  
663 II ANOVA with status, species, sex, and age as independent variables (Table S2); the weight gain, defined  
664 as the difference in weights at beginning and the end of the experiment, as dependent variable (Fig. 6B);  
665 and no interaction terms. If interaction terms were also used for the model, the p-value for the  
666 difference in means between breeders and non-breeders changed from  $7.49 \times 10^{-3}$ , as reported above, to  
667  $7.46 \times 10^{-6}$ .

## 668 **Bone density measurements**

669 Frozen carcasses of all *F. micklei* that had been part of the transcriptome study were scanned with a  
670 self-shielded desktop small- animal computer tomography scanner (X-CUBE, Molecubes, Belgium). The  
671 x-ray source was a tungsten anode (peak voltage, 50 kVp; tube current, 350  $\mu$ A; 0.8 mm aluminum  
672 filter). The detector was a cesium iodide (CsI) flat-panel, building up a screen with 1536 x 864 pixels.  
673 Measurements were carried for individual 120 ms exposures, with angular sampling intervals of 940  
674 exposures per rotation, for to a total of 7 rotations and a total exposure time of 789.6 seconds.  
675 First, we first performed a calibration of the reconstructed CT data in terms of equivalent mineral  
676 density. For this purpose, we used a bone density calibration phantom (BDC; QRM GmbH, Moehrendorf,  
677 Germany) composed of five cylindrical inserts with a diameter of 5 mm containing various densities of  
678 calcium hydroxyapatite (CaHA) surrounded by epoxy resin on a cylindrical shape. The nominal values of  
679 CaHA were 0, 100, 200, 400, and 800 mg HA/cm<sup>3</sup>, corresponding to a density of 1.13, 1.16, 1.25,  
680 1.64, and 1.90 g/cm<sup>3</sup> (certified with an accuracy of  $\pm 0.5$  %). The BDC was imaged and reconstructed with



681 the same specifications as each probe. From the reconstructed Hounsfield Units, a linear relationship  
682 was determined against the known mineral concentrations.

683 Reconstruction of the acquired computer tomography data was carried with an Image Space  
684 Reconstruction Algorithm, and spatial resolution was limited to the 100  $\mu\text{m}$  voxel matrix reconstruction.  
685 Spherical regions of interest (radius, 0.7 mm) were drawn on the sagittal plane of vertebrae T12, L1, and  
686 L2. Care was taken to include all cancellous bone, excluding the cortical edges. Average Hounsfield Unit  
687 values were computed on the calibration curve to finally retrieve equivalent densities of the regions of  
688 interest.

689 Statistical analysis was performed using general linear models with bone density (Hounsfield Units) as  
690 dependent variable, age (in days) as continuous covariate, and reproductive status and sex as nominal  
691 cofactors. Models were calculated for each vertebra individually (individual models) and across all three  
692 vertebrae (full model); in this latter case, vertebral number was added as additional categorical cofactor.  
693 In all models, only main effects were calculated, no interactions. Analyses were performed with IBM  
694 SPSS version 25 (Fig. 6C, Table S11).

## 695 **Abbreviations**

696 ANOVA – analysis of variance

697 ACTH – adrenocorticotrophic hormone

698 DAA – Digital Aging Atlas

699 DEG – differentially expressed gene

700 DHEA – Dehydroepiandrosterone

701 FDR – false discovery rate

702 KEGG – Kyoto Encyclopedia of Genes and Genomes

703 MSigDB – Molecular Signatures Database

## 704 **Declarations**

### 705 **Ethics approval and consent to participate**

706 Animal housing and tissue collection were compliant with national and state legislation (breeding  
707 allowances 32-2-1180-71/328 and 32-2-11-80-71/345, ethics/animal experimentation approval 84–  
708 02.04.2013/A164, Landesamt für Natur-, Umwelt- und Verbraucherschutz Nordrhein-Westfalen).

### 709 **Consent for publication**

710 Not applicable.

### 711 **Availability of data and materials**

712 Read datasets generated during the current study are available in the European Nucleotide Archive,  
713 study ID: PRJEB29798.

### 714 **Competing interests**

715 The authors declare that they have no competing interests.

### 716 **Funding**

717 This work was funded by the Deutsche Forschungsgemeinschaft (DFG, PL 173/8-1 and DA 992/3-1). The  
718 funders had no role in study design, data collection and analysis, decision to publish, or preparation of  
719 the manuscript.

## 720 **Authors' contributions**

721 PD, MP, and KS conceived the project (with input from SB) and acquired the funding. PD, KS, and AS  
722 monitored the implementation of the project. PD, SB, HB, and PVD were responsible for housing the  
723 animals and implementing concrete mating schemes. PD, SB, ST, MGo, MS, JK, and PFC performed  
724 physiological measurements. PD, YH, KS, AS, SB, and MB sampled the animals. MG supervised library  
725 preparation and sequencing. AS, KS, and MB analyzed the data. AS, PD, MP, KS, SH, and PK interpreted  
726 the data and drafted the manuscript concept. All authors wrote and approved the manuscript.

## 727 **Acknowledgments**

728 We thank Ivonne Görlich, Christiane Vole, and Klaus Huse for excellent assistance in the preparation of  
729 biological samples. We thank Konstantin Riege for fruitful discussions on the analysis of the data. We  
730 thank Debra Weih and Flo Witte for proofreading the manuscript.

## 731 **Figure legends**

732 **Figure 1.** Motivation (A) and principle of the experimental setup (B).

733 **A)** For both species of the *Fukomys* genus that were examined in this study – *F. mechowii* and *F.*  
734 *micklei* – it was shown that, in captivity, breeder live significantly longer than non-breeders. Lifespan  
735 data were redrawn from Dammann & Burda and Dammann et al. [13, 14]. **B)** Schematic overview of  
736 animal treatments. Non-breeders (open shapes) are offspring of the breeder pair of their family (filled  
737 shapes) and do not mate with other members of the same family because of incest avoidance in  
738 *Fukomys* [12]. Therefore, non-breeders of opposite sexes were taken from different families – labeled as  
739 “Family A” (blue) and “Family B” (red) – and permanently housed in a separate terrarium. The two  
740 unrelated animals mated with each other, thus producing offspring and becoming breeders of the new

741 “Family C” (green). In addition to the animals that were promoted to be slower-aging breeders, age-  
742 matched controls that remained in the faster-aging non-breeders of “Family A” and “Family B” were  
743 included in our study – in most cases full siblings (ideally litter mates) of the respective new breeders.  
744 After at least two years and two pregnancies in “Family C”, breeders from “Family C” and their controls  
745 from Colonies A and B were put to death, and tissues were sampled for later analysis, that included  
746 identification of differentially expressed genes (DEGs). The shown experimental scheme was conducted  
747 with 5 to 7 (median 6) specimens per cohort (defined by breeding status, sex, species) and 12 to 15  
748 tissues (median 14) per specimen: in total, 46 animals and 636 samples.

749 **Figure 2.** Total variance distribution (A) and numbers of differentially expressed genes (B).

750 **A)** Relative contribution of the model factors (breeding status, sex, species, tissue) and their  
751 combinations (:) to the total variance in the examined data set. The relative contributions were  
752 determined by principal variance component analysis. **B)** Numbers of identified differentially expressed  
753 genes per tissue and model factor (first column, species; second, sex; third, status). Stacked bars  
754 indicate the proportions of up- and down-regulated genes (red and green, respectively; directions: *F.*  
755 *mechowii* vs. *F. micklei*, female vs. male, breeder vs. non-breeder).

756 **Figure 3.** Assessment of the aging relevance of genes that are differentially expressed between breeders  
757 and non-breeders.

758 **A)** For each tissue, we separately tested whether the identified differentially expressed genes between  
759 status groups significantly overlapped with the genes within the Digital Aging Atlas database (Fisher’s  
760 exact test, FDR < 0.05). Significant overlaps were found for three tissues: adrenal gland, ovary and  
761 pituitary gland. The Venn-diagram depicts the overlaps of these three tissues with the Digital Aging Atlas  
762 and with each other (\*\* : FDR < 0.01; \*\*\* : FDR < 0.001). **B)** A similar experiment comparing the

763 transcriptomes of breeders versus non-breeders was recently conducted in naked mole-rats (NMRs) and  
764 guinea pig (GPs) [7]. For NMR there is also evidence that breeders have a (slightly) longer lifespan than  
765 non-breeders, whereas for GP the opposite is assumed [7, 27]. Across ten tissues that were examined in  
766 both studies, the analysis determined whether status-dependent differentially expressed genes  
767 identified in the current study were regulated in the same or opposite direction in NMR and GP (Table  
768 S6). The listed p-values (two-sided binomial exact test; hypothesized probability, 0.5) describe how  
769 extremely the ratio of genes expressed in the same and opposite directions deviates from a 50:50 ratio.  
770 Green and orange indicate the majority and minority of genes within a comparison, respectively. Figure  
771 created with BioRender.com.

772 **Figure 4.** Pathways and metabolic functions enriched for status-dependent differential gene expression.  
773 Shown are all Kyoto Encyclopedia of Genes and Genomes (KEGG) pathways (A) and Molecular Signatures  
774 Database (MSigDB) hallmarks (B) that are enriched for differential gene expression between breeders  
775 and non-breeders at the weighted cross-tissue level (false discovery rate [FDR], < 0.1). The numbers  
776 within the cells give the FDR, i.e., the multiple testing corrected p-value, for the respective  
777 pathway/hallmark and tissue. As indicated by the color key, red and green stand for up- or down-  
778 regulated in breeders, respectively. White indicates a pathway/hallmark that is significantly affected by  
779 differential expression and whose signals for up- and down-regulation are approximately balanced. Dark  
780 colors up to black mean that there is little or no evidence that the corresponding pathway/hallmark is  
781 affected by differential gene expression. Figures S3 and S4 provide detailed overviews of all  
782 pathways/hallmarks that are enriched in at least one tissue for status-dependent differential expression  
783 signals.

784 **Figure 5.** Model of the stress axis as a key mechanism for status-dependent lifespan differences in  
785 *Fukomys*. From a wide range of mammals, including humans [52], dogs [129], horses [130], cats [131],

786 and guinea pigs [132], it is known that chronic glucocorticoid excess leads to a number of pathologic  
787 symptoms that largely overlap with those of aging and result in considerably higher mortality rates for  
788 affected individuals [53#808]. The most common cause of chronic glucocorticoid excess is excessive  
789 secretion of the adrenocorticotrophic hormone (ACTH) by the pituitary gland. ACTH is transported via the  
790 blood to the adrenal cortex where it binds to the ACTH-receptor (ACTHR; encoded by the gene *MC2R*)  
791 which induces the production of glucocorticoids, especially cortisol. Glucocorticoids are transported to  
792 the various tissues, where they exert their effect by activating the glucocorticoid receptor (NR3C1) that  
793 acts as a transcription factor and regulates hundreds of genes. The constant overuse of this  
794 transcriptional pattern eventually leads to the listed symptoms. Our hypothesis is that the permanent,  
795 high expression of the ACTH-receptor in *Fukomys* non-breeders causes effects similar to those known  
796 from overproduction of the hormone. In line with this hypothesis, i) cortisol levels are increased in non-  
797 breeders and ii) target genes of the glucocorticoid-receptor are highly enriched for status-dependent  
798 differential gene expression. Furthermore, the animals were examined for common symptoms of  
799 chronic glucocorticoid excess: iii) non-breeders gained more weight during the experiment than  
800 breeders, iv) exhibited lower bone density at the end of the experiment, and v) lower gene expression  
801 in the GH-/IGF1 axis than breeders.

802 **Figure 6.** *MC2R* gene expression and physiological measurements. **A)** Gene expression of *MC2R*, coding  
803 for the ACTH receptor, in breeders and non-breeders of *Fukomys mechowii* and *Fukomys micklei*. **B)**  
804 Weight gain of the animals during the experiment. **C)** Measured optical densities of vertebra T12 of  
805 *Fukomys micklei* breeders and non-breeders. Red, breeders; blue, non-breeders; filled, *F. mechowii*;  
806 unfilled, *F. micklei*; circles, females; squares, males; dashed line, median. Statistically significant  
807 differences between breeders and non-breeders were determined with A) DESeq2 [118] and B+C)  
808 analysis of variance with status, species, sex, and age as independent variables (see methods).

## 809 **Additional files**

### 810 **Supplement Figures**

811 **Figure S1.** Overview of the tissues examined in this study with a schematic mole-rat representation.

812 **Figure S2.** Clustering of the 636 examined samples. Clustering was performed based on the Euclidian  
813 distance of logarithmized pairwise Pearson read count correlations using the UPGMA method.

814 **Figure S3.** Full overview of Kyoto Encyclopedia of Genes and Genomes (KEGG) pathways that are  
815 enriched for status-dependent differential gene expression.

816 **Figure S4.** Full overview of Molecular Signatures Database (MsigDB) hallmarks that are enriched for  
817 status-dependent differential gene expression.

818 **Figure S5.** Pairwise connectivity of metabolic pathways that are enriched for status-dependent  
819 differential gene expression at the cross-tissue level.

820 **Figure S6.** Status-dependent regulation of Kyoto Encyclopedia of Genes and Genomes (KEGG) pathway  
821 hsa00140 Steroid hormone biosynthesis at the cross-tissue level.

822 **Figure S7.** Status-dependent regulation of Kyoto Encyclopedia of Genes and Genomes (KEGG) pathway  
823 hsa05016 Huntington's disease at the cross-tissue level.

824 **Figure S8.** Status-dependent regulation of Kyoto Encyclopedia of Genes and Genomes (KEGG) pathway  
825 hsa05012 Parkinson's disease at the cross-tissue level.

826 **Figure S9.** Status-dependent regulation of Kyoto Encyclopedia of Genes and Genomes (KEGG) pathway  
827 hsa050160 Alzheimer's disease at the cross-tissue level.

828 **Supplement Tables**

829 **Table S1.** Overview of number of samples that were examined with regard to status, sex, species, and  
830 tissue.

831 **Table S2.** Animal description.

832 **Table S3.** Overview of the tissues that were successfully sampled for each type of animal.

833 **Table S4.** Pairing scheme: *F. mechowii*.

834 **Table S5.** Pairing scheme: *F. micklei*.

835 **Table S6.** Analysis of the direction of status-dependent differentially expressed genes that were  
836 identified in this study (two *Fukomys* species) in similar experiments with naked mole-rats and guinea  
837 pigs (Bens et al. 2018, <https://www.ncbi.nlm.nih.gov/pmc/articles/PMC6090939/>).

838 **Table S7.** Analysis of status-dependent differential gene expression enrichment on glucocorticoid  
839 receptor target genes that were determined by Phuc Le et al. 2005  
840 (<https://www.ncbi.nlm.nih.gov/pmc/articles/PMC1186734/>), using chromatin immunoprecipitation  
841 (CHIP).

842 **Table S8.** Analysis of status-dependent differential gene expression enrichment on glucocorticoid  
843 receptor target genes that were determined by Phuc Le et al. 2005  
844 (<https://www.ncbi.nlm.nih.gov/pmc/articles/PMC1186734/>), using a differential gene expression  
845 analysis.

846 **Table S9.** Sample description.

847 **Table S10.** WGCNA module clustering and functional enrichment analysis regarding these modules.



848 **Table S11.** Bone density measurements.

849 **Supplement Data**

850 **Data S1.** (zip) For each KEGG pathway and MSigDB hallmark that was detected to be significantly (FDR <  
851 0.1) enriched for status-dependent differential expression at the weighted cross-tissue level, the data  
852 set contains a \*.tsv file with the genes that form the respective pathway/hallmark sorted by their  
853 individual contribution to the enrichment. The files also provide an overview of the p-values and fold-  
854 changes of those genes in those tissues in which the genes are expressed most highly.

855 **Data S2.** (fa.gz) Transcript isoforms of *F. mechowii* used for read mapping.

856 **Data S3.** (fa.gz) Transcript isoforms of *F. micklei* used for read mapping.

857 **Data S4.** (tsv.gz) Raw read counts for all 17,065 genes and 636 samples that were analyzed in this study  
858 using RNA-seq.

859 **Data S5.** (zip) DESeq2 results for status-dependent gene expression (direction: breeder/non-breeder).  
860 The data set contains one \*.tsv file per analyzed tissue.

861 **Data S6.** (zip) DESeq2 results for sex-dependent gene expression (direction: female/male). The data set  
862 contains one \*.tsv file per analyzed tissue.

863 **Data S7.** (zip) DESeq2 results for species-dependent gene expression (direction: mechowii/micklei).  
864 The data set contains one \*.tsv file per analyzed tissue.

865 **Data S8.** (zip) Enrichment analysis results for status-dependent gene expression on KEGG pathways. The  
866 data set contains one \*.tsv file per analyzed tissue, as well as an additional \*.tsv file for the weighted  
867 cross-tissue level results.

868 **Data S9.** (zip) Enrichment analysis results for status-dependent gene expression on MSigDB hallmarks.

869 The data set contains one \*.tsv file per analyzed tissue, as well as an additional \*.tsv file for the  
870 weighted cross-tissue level results.

871 **Data S10.** (tsv.gz) Overview of the weighted cross-tissue differential gene expression analysis. Contains  
872 all p-values, fold-changes, and mean expression values for all genes across all tissues as well as the  
873 weighted, combined cross-tissue test statistics, p-values, and fold-changes for all genes.

874 **Data S11.** (tsv) Genes of the Digital Aging Atlas used in this study.

875 **Data S12.** (zip) Comparison of status-dependent differentially expressed genes with results of an earlier,  
876 similar study involving naked mole-rats (NMRs) and guinea pigs (GPs). The data set contains one \*.tsv  
877 file for each of the ten tissues that were examined in both studies. Each \*.tsv file lists the differentially  
878 expressed genes for the respective tissue as identified in this study with the determined FDRs and fold-  
879 changes, as well as the fold-changes determined in the earlier study using naked mole-rats and guinea  
880 pigs.

881 **Data S13.** (zip) Glucocorticoid receptor target genes that were determined by Phuc Le *et al.* and tested  
882 in this study for enrichment of status-dependent differential gene expression. The data set contains one  
883 \*.tsv file each for target genes determined via chromatin immunoprecipitation (CHIP) and differential  
884 gene expression analysis. Phuc Le *et al.* determined differentially expressed genes between mice that  
885 were treated with exogenous glucocorticoids and untreated controls. The relevant table columns from  
886 Phuc Le *et al.* were added by human gene symbol and Entrez IDs that were used for enrichment analysis.

## 887 **References**

888 1. Keller L, Jemielity S: **Social insects as a model to study the molecular basis of ageing.** *Exp*  
889 *Gerontol* 2006, **41**:553-556.

- 890 2. Parker JD, Parker KM, Sohal BH, Sohal RS, Keller L: **Decreased expression of Cu-Zn superoxide**  
891 **dismutase 1 in ants with extreme lifespan.** *Proc Natl Acad Sci U S A* 2004, **101**:3486-3489.
- 892 3. Austad SN: **Comparative biology of aging.** *J Gerontol A Biol Sci Med Sci* 2009, **64**:199-201.
- 893 4. Dammann P: **Slow aging in mammals-Lessons from African mole-rats and bats.** *Semin Cell Dev*  
894 *Biol* 2017, **70**:154-163.
- 895 5. Salmon AB, Leonard S, Masamsetti V, Pierce A, Podlutzky AJ, Podlutzkaya N, Richardson A,  
896 Austad SN, Chaudhuri AR: **The long lifespan of two bat species is correlated with resistance to**  
897 **protein oxidation and enhanced protein homeostasis.** *FASEB J* 2009, **23**:2317-2326.
- 898 6. Austad SN: **Candidate bird species for use in aging research.** *ILAR J* 2011, **52**:89-96.
- 899 7. Bens M, Szafranski K, Holtze S, Sahm A, Groth M, Kestler HA, Hildebrandt TB, Platzer M: **Naked**  
900 **mole-rat transcriptome signatures of socially suppressed sexual maturation and links of**  
901 **reproduction to aging.** *BMC Biol* 2018, **16**:77.
- 902 8. Sichilima AM, Faulkes CG, Bennett NC: **Field evidence for aseasonality of reproduction and**  
903 **colony size in the Afrotropical giant mole-rat *Fukomys mechowii* (Rodentia: Bathyergidae).**  
904 *African Zoology* 2008, **43**:144-149.
- 905 9. Skliba J, Mazoch V, Patzenhauerova H, Hrouzková E, Lövy M, Kott O, Šumbera R: **A maze-lover's**  
906 **dream: Burrow architecture, natural history and habitat characteristics of Ansell's mole-rat**  
907 **(*Fukomys ansellii*).** *MAMMALIAN BIOLOGY* 2012, **77**:420-427.
- 908 10. Jarvis JU, Bennett NC: **Eusociality has evolved independently in two genera of bathyergid**  
909 **mole-rats — but occurs in no other subterranean mammal.** *Behavioral Ecology and*  
910 *Sociobiology* 1993, **33**:253-260.
- 911 11. Scharff A, Locker-Gruetjen O, Kawalika M, Burda H: **Natural history of the Giant mole-rat,**  
912 ***Cryptomys mechowi* (Rodentia: Bathyergidae) from Zambia.** *Journal of Mammalogy* 2001,  
913 **82**:1002-1015.
- 914 12. Burda H: **Individual recognition and incest avoidance in eusocial common mole-rats rather**  
915 **than reproductive suppression by parents.** *Experientia* 1995, **51**:411-413.
- 916 13. Dammann P, Burda H: **Sexual activity and reproduction delay ageing in a mammal.** *Curr Biol*  
917 2006, **16**:R117-118.
- 918 14. Dammann P, Šumbera R, Massmann C, Scherag A, Burda H: **Extended longevity of**  
919 **reproductives appears to be common in *Fukomys* mole-rats (Rodentia, Bathyergidae).** *PLoS*  
920 *One* 2011, **6**:e18757.
- 921 15. Carmona JJ, Michan S: **Biology of Healthy Aging and Longevity.** *Rev Invest Clin* 2016, **68**:7-16.
- 922 16. Valenzano DR, Terzibasi E, Genade T, Cattaneo A, Domenici L, Cellerino A: **Resveratrol Prolongs**  
923 **Lifespan and Retards the Onset of Age-Related Markers in a Short-Lived Vertebrate.** *Current*  
924 *Biology* 2006, **16**:296-300.
- 925 17. Johnson SC, Rabinovitch PS, Kaeberlein M: **mTOR is a key modulator of ageing and age-related**  
926 **disease.** *Nature* 2013, **493**:338-345.
- 927 18. Morimoto RI, Cuervo AM: **Protein homeostasis and aging: taking care of proteins from the**  
928 **cradle to the grave.** *J Gerontol A Biol Sci Med Sci* 2009, **64**:167-170.
- 929 19. Harman D: **Aging: a theory based on free radical and radiation chemistry.** *J Gerontol* 1956,  
930 **11**:298-300.
- 931 20. Harman D: **Aging: overview.** *Ann N Y Acad Sci* 2001, **928**:1-21.
- 932 21. Dammann P, Sell DR, Begall S, Strauch C, Monnier VM: **Advanced glycation end-products as**  
933 **markers of aging and longevity in the long-lived Ansell's mole-rat (*Fukomys ansellii*).** *J Gerontol*  
934 *A Biol Sci Med Sci* 2012, **67**:573-583.

- 935 22. Schmidt CM, Blount JD, Bennett NC: **Reproduction is associated with a tissue-dependent**  
936 **reduction of oxidative stress in eusocial female Damaraland mole-rats (*Fukomys damarensis*).**  
937 *PLoS One* 2014, **9**:e103286.
- 938 23. Henning Y, Vole C, Begall S, Bens M, Broecker-Preuss M, Sahm A, Szafranski K, Burda H,  
939 Dammann P: **Unusual ratio between free thyroxine and free triiodothyronine in a long-lived**  
940 **mole-rat species with bimodal ageing.** *PLoS One* 2014, **9**:e113698.
- 941 24. Sahm A, Bens M, Henning Y, Vole C, Groth M, Schwab M, Hoffmann S, Platzer M, Szafranski K,  
942 Dammann P: **Higher gene expression stability during aging in long-lived giant mole-rats than in**  
943 **short-lived rats.** *Aging (Albany NY)* 2018, **10**:3938-3956.
- 944 25. Sherman PW, Jarvis JUM: **Extraordinary life spans of naked mole-rats (*Heterocephalus glaber*).**  
945 *Journal of Zoology* 2002, **258**:307-311.
- 946 26. Buffenstein R: **Negligible senescence in the longest living rodent, the naked mole-rat: insights**  
947 **from a successfully aging species.** *J Comp Physiol B* 2008, **178**:439-445.
- 948 27. Ruby JG, Smith M, Buffenstein R: **Naked Mole-Rat mortality rates defy gompertzian laws by not**  
949 **increasing with age.** *Elife* 2018, **7**.
- 950 28. Dammann P, Scherag A, Zak N, Szafranski K, Holtze S, Begall S, Burda H, Kestler HA, Hildebrandt  
951 T, Platzer M: **Comment on 'Naked mole-rat mortality rates defy Gompertzian laws by not**  
952 **increasing with age'.** *Elife* 2019, **8**.
- 953 29. Craig T, Smelick C, Tacutu R, Wuttke D, Wood SH, Stanley H, Janssens G, Savitskaya E, Moskalev  
954 A, Arking R, de Magalhaes JP: **The Digital Ageing Atlas: integrating the diversity of age-related**  
955 **changes into a unified resource.** *Nucleic Acids Res* 2015, **43**:D873-878.
- 956 30. Kanehisa M, Furumichi M, Tanabe M, Sato Y, Morishima K: **KEGG: new perspectives on**  
957 **genomes, pathways, diseases and drugs.** *Nucleic Acids Res* 2017, **45**:D353-D361.
- 958 31. Liberzon A, Birger C, Thorvaldsdottir H, Ghandi M, Mesirov JP, Tamayo P: **The Molecular**  
959 **Signatures Database (MSigDB) hallmark gene set collection.** *Cell Syst* 2015, **1**:417-425.
- 960 32. Hofmann JW, Zhao X, De Cecco M, Peterson AL, Pagliaroli L, Manivannan J, Hubbard GB, Ikeno Y,  
961 Zhang Y, Feng B, et al: **Reduced expression of MYC increases longevity and enhances**  
962 **healthspan.** *Cell* 2015, **160**:477-488.
- 963 33. Langfelder P, Horvath S: **WGCNA: an R package for weighted correlation network analysis.**  
964 *BMC Bioinformatics* 2008, **9**:559.
- 965 34. Schiaffino S, Mammucari C: **Regulation of skeletal muscle growth by the IGF1-Akt/PKB**  
966 **pathway: insights from genetic models.** *Skelet Muscle* 2011, **1**:4.
- 967 35. Jung HJ, Suh Y: **Regulation of IGF -1 signaling by microRNAs.** *Front Genet* 2014, **5**:472.
- 968 36. Junnila RK, List EO, Berryman DE, Murrey JW, Kopchick JJ: **The GH/IGF-1 axis in ageing and**  
969 **longevity.** *Nat Rev Endocrinol* 2013, **9**:366-376.
- 970 37. Cannata D, Vijayakumar A, Fierz Y, LeRoith D: **The GH/IGF-1 axis in growth and development:**  
971 **new insights derived from animal models.** *Adv Pediatr* 2010, **57**:331-351.
- 972 38. Lozier NR, Kopchick JJ, de Lacalle S: **Relative Contributions of Myostatin and the GH/IGF-1 Axis**  
973 **in Body Composition and Muscle Strength.** *Front Physiol* 2018, **9**:1418.
- 974 39. Raisingani M, Preneet B, Kohn B, Yakar S: **Skeletal growth and bone mineral acquisition in type**  
975 **1 diabetic children; abnormalities of the GH/IGF-1 axis.** *Growth Horm IGF Res* 2017, **34**:13-21.
- 976 40. Bodart G, Goffinet L, Morrhaye G, Farhat K, de Saint-Hubert M, Debacq-Chainiaux F, Swine C,  
977 Geenen V, Martens HJ: **Somatotrope GHRH/GH/IGF-1 axis at the crossroads between**  
978 **immunosenescence and frailty.** *Ann N Y Acad Sci* 2015, **1351**:61-67.
- 979 41. Carotti S, Guarino MPL, Valentini F, Porzio S, Vespasiani-Gentilucci U, Perrone G, Zingariello M,  
980 Gallo P, Cicala M, Picardi A, Morini S: **Impairment of GH/IGF-1 Axis in the Liver of Patients with**  
981 **HCV-Related Chronic Hepatitis.** *Horm Metab Res* 2018, **50**:145-151.

- 982 42. Liu D, Ahmet A, Ward L, Krishnamoorthy P, Mandelcorn ED, Leigh R, Brown JP, Cohen A, Kim H:  
983 **A practical guide to the monitoring and management of the complications of systemic**  
984 **corticosteroid therapy.** *Allergy Asthma Clin Immunol* 2013, **9**:30.
- 985 43. Miller WL, Auchus RJ: **The molecular biology, biochemistry, and physiology of human**  
986 **steroidogenesis and its disorders.** *Endocr Rev* 2011, **32**:81-151.
- 987 44. Wang J, Mitsche MA, Lutjohann D, Cohen JC, Xie XS, Hobbs HH: **Relative roles of ABCG5/ABCG8**  
988 **in liver and intestine.** *J Lipid Res* 2015, **56**:319-330.
- 989 45. Liu Y, Ordovas JM, Gao G, Province M, Straka RJ, Tsai MY, Lai CQ, Zhang K, Borecki I, Hixson JE, et  
990 al: **The SCARB1 gene is associated with lipid response to dietary and pharmacological**  
991 **interventions.** *J Hum Genet* 2008, **53**:709-717.
- 992 46. Hammer F, Subtil S, Lux P, Maser-Gluth C, Stewart PM, Allolio B, Arlt W: **No Evidence for Hepatic**  
993 **Conversion of Dehydroepiandrosterone (DHEA) Sulfate to DHEA: In Vivo and in Vitro Studies.**  
994 *The Journal of Clinical Endocrinology & Metabolism* 2005, **90**:3600-3605.
- 995 47. Rutkowski K, Sowa P, Rutkowska-Talipska J, Kuryliszyn-Moskal A, Rutkowski R:  
996 **Dehydroepiandrosterone (DHEA): hypes and hopes.** *Drugs* 2014, **74**:1195-1207.
- 997 48. Celec P, Starka L: **Dehydroepiandrosterone - is the fountain of youth drying out?** *Physiol Res*  
998 2003, **52**:397-407.
- 999 49. Baulieu EE: **Dehydroepiandrosterone (DHEA): a fountain of youth?** *J Clin Endocrinol Metab*  
1000 1996, **81**:3147-3151.
- 1001 50. Walker JJ, Spiga F, Gupta R, Zhao Z, Lightman SL, Terry JR: **Rapid intra-adrenal feedback**  
1002 **regulation of glucocorticoid synthesis.** *J R Soc Interface* 2015, **12**:20140875.
- 1003 51. Chabre O: **[Cushing syndrome: Physiopathology, etiology and principles of therapy].** *Presse*  
1004 *Med* 2014, **43**:376-392.
- 1005 52. Ferrau F, Korbonits M: **Metabolic comorbidities in Cushing's syndrome.** *Eur J Endocrinol* 2015,  
1006 **173**:M133-157.
- 1007 53. Etxabe J, Vazquez JA: **Morbidity and mortality in Cushing's disease: an epidemiological**  
1008 **approach.** *Clin Endocrinol (Oxf)* 1994, **40**:479-484.
- 1009 54. Gjerstad JK, Lightman SL, Spiga F: **Role of glucocorticoid negative feedback in the regulation of**  
1010 **HPA axis pulsatility.** *Stress* 2018, **21**:403-416.
- 1011 55. Phuc Le P, Friedman JR, Schug J, Brestelli JE, Parker JB, Bochkis IM, Kaestner KH: **Glucocorticoid**  
1012 **receptor-dependent gene regulatory networks.** *PLoS Genet* 2005, **1**:e16.
- 1013 56. Tatar M, Bartke A, Antebi A: **The endocrine regulation of aging by insulin-like signals.** *Science*  
1014 2003, **299**:1346-1351.
- 1015 57. Chahal HS, Drake WM: **The endocrine system and ageing.** *J Pathol* 2007, **211**:173-180.
- 1016 58. Jones CM, Boelaert K: **The Endocrinology of Ageing: A Mini-Review.** *Gerontology* 2015, **61**:291-  
1017 300.
- 1018 59. Allolio B, Arlt W: **DHEA treatment: myth or reality?** *Trends in Endocrinology & Metabolism* 2002,  
1019 **13**:288-294.
- 1020 60. Webb SJ, Geoghegan TE, Prough RA, Michael Miller KK: **The biological actions of**  
1021 **dehydroepiandrosterone involves multiple receptors.** *Drug Metab Rev* 2006, **38**:89-116.
- 1022 61. Maggio M, Lauretani F, Ceda GP, Bandinelli S, Ling SM, Metter EJ, Artoni A, Carassale L, Cazzato  
1023 A, Ceresini G, et al: **Relationship between low levels of anabolic hormones and 6-year**  
1024 **mortality in older men: the aging in the Chianti Area (InCHIANTI) study.** *Arch Intern Med* 2007,  
1025 **167**:2249-2254.
- 1026 62. Traish AM, Kang HP, Saad F, Guay AT: **Dehydroepiandrosterone (DHEA)--a precursor steroid or**  
1027 **an active hormone in human physiology.** *J Sex Med* 2011, **8**:2960-2982; quiz 2983.



- 1028 63. Samaras N, Samaras D, Forster A, Frangos E, Philippe J: **[Age related dehydroepiandrosterone**  
1029 **decrease: clinical significance and therapeutic interest]**. *Rev Med Suisse* 2015, **11**:321-324.
- 1030 64. Burkhardt T, Schmidt NO, Vettorazzi E, Aberle J, Mengel M, Flitsch J: **DHEA(S)--a novel marker in**  
1031 **Cushing's disease**. *Acta Neurochir (Wien)* 2013, **155**:479-484; discussion 484.
- 1032 65. Fridmanis D, Roga A, Klovinis J: **ACTH Receptor (MC2R) Specificity: What Do We Know About**  
1033 **Underlying Molecular Mechanisms?** *Front Endocrinol (Lausanne)* 2017, **8**:13.
- 1034 66. Becker DE: **Basic and clinical pharmacology of glucocorticosteroids**. *Anesth Prog* 2013, **60**:25-  
1035 31; quiz 32.
- 1036 67. Newfield RS: **ACTH receptor blockade: a novel approach to treat congenital adrenal**  
1037 **hyperplasia, or Cushing's disease**. *Med Hypotheses* 2010, **74**:705-706.
- 1038 68. Imai T, Sarkar D, Shibata A, Funahashi H, Morita-Matsuyama T, Kikumori T, Ohmori S, Seo H:  
1039 **Expression of adrenocorticotropin receptor gene in adrenocortical adenomas from patients**  
1040 **with Cushing syndrome: possible contribution for the autonomous production of cortisol**. *Ann*  
1041 *Surg* 2001, **234**:85-91.
- 1042 69. Lin L, Hindmarsh PC, Metherell LA, Alzyoud M, Al-Ali M, Brain CE, Clark AJ, Dattani MT,  
1043 Achermann JC: **Severe loss-of-function mutations in the adrenocorticotropin receptor (ACTHR,**  
1044 **MC2R) can be found in patients diagnosed with salt-losing adrenal hypoplasia**. *Clin Endocrinol*  
1045 *(Oxf)* 2007, **66**:205-210.
- 1046 70. Beuschlein F, Fassnacht M, Klink A, Allolio B, Reincke M: **ACTH-receptor expression, regulation**  
1047 **and role in adrenocortical tumor formation**. *Eur J Endocrinol* 2001, **144**:199-206.
- 1048 71. Ochi A, Adachi T, Inokuchi K, Ogawa K, Nakamura Y, Chiba Y, Kawasaki S, Onishi Y, Onuma Y,  
1049 Munetsugu Y, et al: **Effects of Aging on the Coagulation Fibrinolytic System in Outpatients of**  
1050 **the Cardiovascular Department**. *Circ J* 2016, **80**:2133-2140.
- 1051 72. Benayoun BA, Pollina EA, Singh PP, Mahmoudi S, Harel I, Casey KM, Dulken BW, Kundaje A,  
1052 Brunet A: **Remodeling of epigenome and transcriptome landscapes with aging in mice reveals**  
1053 **widespread induction of inflammatory responses**. *Genome Res* 2019, **29**:697-709.
- 1054 73. Lowe G, Rumley A: **The relevance of coagulation in cardiovascular disease: what do the**  
1055 **biomarkers tell us?** *Thromb Haemost* 2014, **112**:860-867.
- 1056 74. Annibaldi A, Meier P: **Checkpoints in TNF-Induced Cell Death: Implications in Inflammation and**  
1057 **Cancer**. *Trends Mol Med* 2018, **24**:49-65.
- 1058 75. Pistritto G, Trisciuglio D, Ceci C, Garufi A, D'Orazi G: **Apoptosis as anticancer mechanism:**  
1059 **function and dysfunction of its modulators and targeted therapeutic strategies**. *Aging (Albany*  
1060 *NY)* 2016, **8**:603-619.
- 1061 76. Baig S, Seevasant I, Mohamad J, Mukheem A, Huri HZ, Kamarul T: **Potential of apoptotic**  
1062 **pathway-targeted cancer therapeutic research: Where do we stand?** *Cell Death Dis* 2016,  
1063 **7**:e2058.
- 1064 77. Hands SL, Proud CG, Wyttenbach A: **mTOR's role in ageing: protein synthesis or autophagy?**  
1065 *Aging (Albany NY)* 2009, **1**:586-597.
- 1066 78. Bartke A: **Growth Hormone and Aging: Updated Review**. *World J Mens Health* 2019, **37**:19-30.
- 1067 79. Rudman D, Feller AG, Nagraj HS, Gergans GA, Lalitha PY, Goldberg AF, Schlenker RA, Cohn L,  
1068 Rudman IW, Mattson DE: **Effects of human growth hormone in men over 60 years old**. *N Engl J*  
1069 *Med* 1990, **323**:1-6.
- 1070 80. Longo VD, Antebi A, Bartke A, Barzilay N, Brown-Borg HM, Caruso C, Curiel TJ, de Cabo R,  
1071 Franceschi C, Gems D, et al: **Interventions to Slow Aging in Humans: Are We Ready?** *Aging Cell*  
1072 2015, **14**:497-510.
- 1073 81. Pitt JN, Kaeberlein M: **Why is aging conserved and what can we do about it?** *PLoS Biol* 2015,  
1074 **13**:e1002131.

- 1075 82. Lopez-Otin C, Blasco MA, Partridge L, Serrano M, Kroemer G: **The hallmarks of aging.** *Cell* 2013,  
1076 **153**:1194-1217.
- 1077 83. Kurosu H, Yamamoto M, Clark JD, Pastor JV, Nandi A, Gurnani P, McGuinness OP, Chikuda H,  
1078 Yamaguchi M, Kawaguchi H, et al: **Suppression of aging in mice by the hormone Klotho.** *Science*  
1079 2005, **309**:1829-1833.
- 1080 84. Baumgart M, Priebe S, Groth M, Hartmann N, Menzel U, Pandolfini L, Koch P, Felder M, Ristow  
1081 M, Englert C, et al: **Longitudinal RNA-Seq Analysis of Vertebrate Aging Identifies Mitochondrial**  
1082 **Complex I as a Small-Molecule-Sensitive Modifier of Lifespan.** *Cell Syst* 2016, **2**:122-132.
- 1083 85. Hipkiss AR: **On why decreasing protein synthesis can increase lifespan.** *Mech Ageing Dev* 2007,  
1084 **128**:412-414.
- 1085 86. Saez I, Vilchez D: **The Mechanistic Links Between Proteasome Activity, Aging and Age-related**  
1086 **Diseases.** *Curr Genomics* 2014, **15**:38-51.
- 1087 87. Perez VI, Buffenstein R, Masamsetti V, Leonard S, Salmon AB, Mele J, Andziak B, Yang T, Edrey Y,  
1088 Friguet B, et al: **Protein stability and resistance to oxidative stress are determinants of**  
1089 **longevity in the longest-living rodent, the naked mole-rat.** *Proc Natl Acad Sci U S A* 2009,  
1090 **106**:3059-3064.
- 1091 88. Rodriguez KA, Edrey YH, Osmulski P, Gaczynska M, Buffenstein R: **Altered Composition of Liver**  
1092 **Proteasome Assemblies Contributes to Enhanced Proteasome Activity in the Exceptionally**  
1093 **Long-Lived Naked Mole-Rat.** *PLOS ONE* 2012, **7**:e35890.
- 1094 89. Pride H, Yu Z, Sunchu B, Mochnick J, Coles A, Zhang Y, Buffenstein R, Hornsby PJ, Austad SN,  
1095 Perez VI: **Long-lived species have improved proteostasis compared to phylogenetically-related**  
1096 **shorter-lived species.** *Biochem Biophys Res Commun* 2015, **457**:669-675.
- 1097 90. Starkov AA: **The role of mitochondria in reactive oxygen species metabolism and signaling.** *Ann*  
1098 *N Y Acad Sci* 2008, **1147**:37-52.
- 1099 91. Balaban RS, Nemoto S, Finkel T: **Mitochondria, oxidants, and aging.** *Cell* 2005, **120**:483-495.
- 1100 92. Bieging KT, Mello SS, Attardi LD: **Unravelling mechanisms of p53-mediated tumour**  
1101 **suppression.** *Nat Rev Cancer* 2014, **14**:359-370.
- 1102 93. Ristow M: **Unraveling the truth about antioxidants: mitohormesis explains ROS-induced health**  
1103 **benefits.** *Nat Med* 2014, **20**:709-711.
- 1104 94. Schielke CKM, Burda H, Henning Y, Okrouhlik J, Begall S: **Higher resting metabolic rate in long-**  
1105 **lived breeding Ansell's mole-rats (*Fukomys anselii*).** *Front Zool* 2017, **14**:45.
- 1106 95. van Heemst D: **Insulin, IGF-1 and longevity.** *Aging Dis* 2010, **1**:147-157.
- 1107 96. Elibol B, Kilic U: **High Levels of SIRT1 Expression as a Protective Mechanism Against Disease-**  
1108 **Related Conditions.** *Front Endocrinol (Lausanne)* 2018, **9**:614.
- 1109 97. Kwon Y, Kim J, Lee CY, Kim H: **Expression of SIRT1 and SIRT3 varies according to age in mice.**  
1110 *Anat Cell Biol* 2015, **48**:54-61.
- 1111 98. Satoh A, Brace CS, Rensing N, Cliften P, Wozniak DF, Herzog ED, Yamada KA, Imai S: **Sirt1**  
1112 **extends life span and delays aging in mice through the regulation of Nk2 homeobox 1 in the**  
1113 **DMH and LH.** *Cell Metab* 2013, **18**:416-430.
- 1114 99. Burnett C, Valentini S, Cabreiro F, Goss M, Somogyvari M, Piper MD, Hoddinott M, Sutphin GL,  
1115 Leko V, McElwee JJ, et al: **Absence of effects of Sir2 overexpression on lifespan in *C. elegans***  
1116 **and *Drosophila*.** *Nature* 2011, **477**:482-485.
- 1117 100. Edrey YH, Salmon AB: **Revisiting an age-old question regarding oxidative stress.** *Free Radic Biol*  
1118 *Med* 2014, **71**:368-378.
- 1119 101. Feng Z, Lin M, Wu R: **The Regulation of Aging and Longevity: A New and Complex Role of p53.**  
1120 *Genes Cancer* 2011, **2**:443-452.

- 1121 102. Giannakou ME, Goss M, Junger MA, Hafen E, Leever SJ, Partridge L: **Long-lived *Drosophila* with**  
1122 **overexpressed dFOXO in adult fat body.** *Science* 2004, **305**:361.
- 1123 103. Carmona-Gutierrez D, Hughes AL, Madeo F, Ruckenstuhl C: **The crucial impact of lysosomes in**  
1124 **aging and longevity.** *Ageing Res Rev* 2016, **32**:2-12.
- 1125 104. Dillin A, Hsu AL, Arantes-Oliveira N, Lehrer-Graiwer J, Hsin H, Fraser AG, Kamath RS, Ahringer J,  
1126 Kenyon C: **Rates of behavior and aging specified by mitochondrial function during**  
1127 **development.** *Science* 2002, **298**:2398-2401.
- 1128 105. Copeland JM, Cho J, Lo T, Jr., Hur JH, Bahadorani S, Arabyan T, Rabie J, Soh J, Walker DW:  
1129 **Extension of *Drosophila* life span by RNAi of the mitochondrial respiratory chain.** *Curr Biol*  
1130 2009, **19**:1591-1598.
- 1131 106. Bartke A: **Somatic growth, aging, and longevity.** *NPJ Aging Mech Dis* 2017, **3**:14.
- 1132 107. Tacutu R, Craig T, Budovsky A, Wuttke D, Lehmann G, Taranukha D, Costa J, Fraifeld VE, de  
1133 Magalhaes JP: **Human Ageing Genomic Resources: integrated databases and tools for the**  
1134 **biology and genetics of ageing.** *Nucleic Acids Res* 2013, **41**:D1027-1033.
- 1135 108. Delaney MA, Nagy L, Kinsel MJ, Treuting PM: **Spontaneous histologic lesions of the adult naked**  
1136 **mole rat (*Heterocephalus glaber*): a retrospective survey of lesions in a zoo population.** *Vet*  
1137 *Pathol* 2013, **50**:607-621.
- 1138 109. Gorbunova V, Hine C, Tian X, Ablaeva J, Gudkov AV, Nevo E, Seluanov A: **Cancer resistance in**  
1139 **the blind mole rat is mediated by concerted necrotic cell death mechanism.** *Proc Natl Acad Sci*  
1140 *U S A* 2012, **109**:19392-19396.
- 1141 110. Seluanov A, Gladyshev VN, Vijg J, Gorbunova V: **Mechanisms of cancer resistance in long-lived**  
1142 **mammals.** *Nat Rev Cancer* 2018, **18**:433-441.
- 1143 111. Berryman DE, Christiansen JS, Johannsson G, Thorner MO, Kopchick JJ: **Role of the GH/IGF-1**  
1144 **axis in lifespan and healthspan: lessons from animal models.** *Growth Horm IGF Res* 2008,  
1145 **18**:455-471.
- 1146 112. Milman S, Huffman DM, Barzilai N: **The Somatotrophic Axis in Human Aging: Framework for the**  
1147 **Current State of Knowledge and Future Research.** *Cell Metab* 2016, **23**:980-989.
- 1148 113. Sahm A, Bens M, Szafranski K, Holtze S, Groth M, Gorchach M, Calkhoven C, Muller C, Schwab M,  
1149 Kraus J, et al: **Long-lived rodents reveal signatures of positive selection in genes associated**  
1150 **with lifespan.** *PLoS Genet* 2018, **14**:e1007272.
- 1151 114. Garcia Montero A, Burda H, Begall S: **Chemical restraint of African mole-rats (*Fukomys* sp.) with**  
1152 **a combination of ketamine and xylazine.** *Vet Anaesth Analg* 2015, **42**:187-191.
- 1153 115. Andrews S: **FastQC A Quality Control tool for High Throughput Sequence Data.**  
1154 <http://www.bioinformatics.babraham.ac.uk/projects/fastqc/>.
- 1155 116. Ezkurdia I, Rodriguez JM, Carrillo-de Santa Pau E, Vazquez J, Valencia A, Tress ML: **Most highly**  
1156 **expressed protein-coding genes have a single dominant isoform.** *J Proteome Res* 2015,  
1157 **14**:1880-1887.
- 1158 117. Li H, Durbin R: **Fast and accurate short read alignment with Burrows-Wheeler transform.**  
1159 *Bioinformatics* 2009, **25**:1754-1760.
- 1160 118. Love MI, Huber W, Anders S: **Moderated estimation of fold change and dispersion for RNA-seq**  
1161 **data with DESeq2.** *Genome Biol* 2014, **15**:550.
- 1162 119. Ching T, Huang S, Garmire LX: **Power analysis and sample size estimation for RNA-Seq**  
1163 **differential expression.** *RNA* 2014, **20**:1684-1696.
- 1164 120. Benjamini Y, Y. H: **Controlling the false discovery rate: A practical and powerful approach to**  
1165 **multiple testing.** *Journal of the Royal Statistical Society Series B (Methodological)* 1995, **57**:289-  
1166 300.



- 1167 121. Väremo L, Nielsen J, Nookaew I: **Enriching the gene set analysis of genome-wide data by**  
1168 **incorporating directionality of gene expression and combining statistical hypotheses and**  
1169 **methods.** *Nucleic Acids Research* 2013, **41**:4378-4391.
- 1170 122. Fridley BL, Jenkins GD, Biernacka JM: **Self-contained gene-set analysis of expression data: an**  
1171 **evaluation of existing and novel methods.** *PLoS one* 2010, **5**:e12693.
- 1172 123. Evangelou M, Rendon A, Ouwehand WH, Wernisch L, Dudbridge F: **Comparison of Methods for**  
1173 **Competitive Tests of Pathway Analysis.** *PLOS ONE* 2012, **7**:e41018.
- 1174 124. Poole W, Gibbs DL, Shmulevich I, Bernard B, Knijnenburg TA: **Combining dependent P-values**  
1175 **with an empirical adaptation of Brown's method.** *Bioinformatics (Oxford, England)* 2016,  
1176 **32**:i430-i436.
- 1177 125. Heard NA, Rubin-Delanchy P: **Choosing between methods of combining  $\Phi$ -values.** *Biometrika*  
1178 2018, **105**:239-246.
- 1179 126. Defays D: **An efficient algorithm for a complete link method.** *The Computer Journal* 1977,  
1180 **20**:364-366.
- 1181 127. Bushel P: **pvca: Principal Variance Component Analysis (PVCA).** 2013.
- 1182 128. Luo W, Brouwer C: **Pathview: an R/Bioconductor package for pathway-based data integration**  
1183 **and visualization.** *Bioinformatics* 2013, **29**:1830-1831.
- 1184 129. Kooistra HS, Galac S: **Recent Advances in the Diagnosis of Cushing's Syndrome in Dogs.** *Topics*  
1185 *in Companion Animal Medicine* 2012, **27**:21-24.
- 1186 130. McCue PM: **Equine Cushing's disease.** *Vet Clin North Am Equine Pract* 2002, **18**:533-543, viii.
- 1187 131. Meijer JC, Lubberink AA, Gruys E: **Cushing's syndrome due to adrenocortical adenoma in a cat.**  
1188 *Tijdschr Diergeneeskd* 1978, **103**:1048-1051.
- 1189 132. Zeugswetter F, Fenske M, Hassan J, Kunzel F: **Cushing's syndrome in a guinea pig.** *Vet Rec* 2007,  
1190 **160**:878-880.
- 1191

**A***F. mechowii*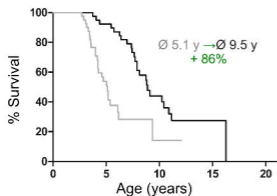*F. micklele*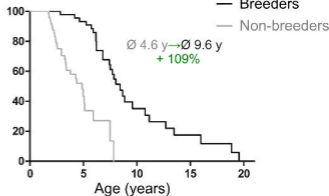**B**

4-7 Replicates per species

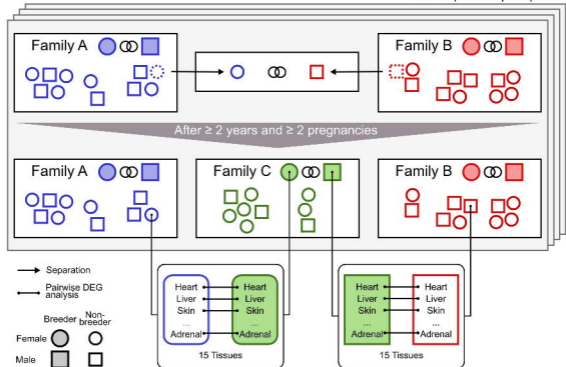

**A**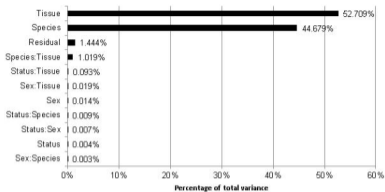**B**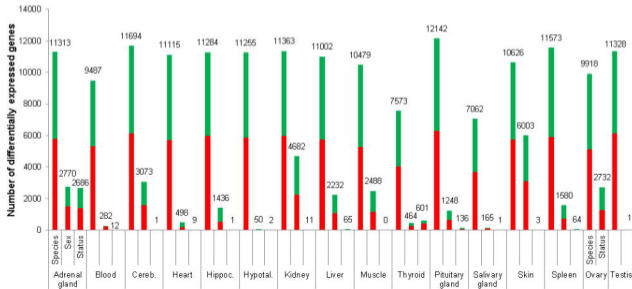

**A**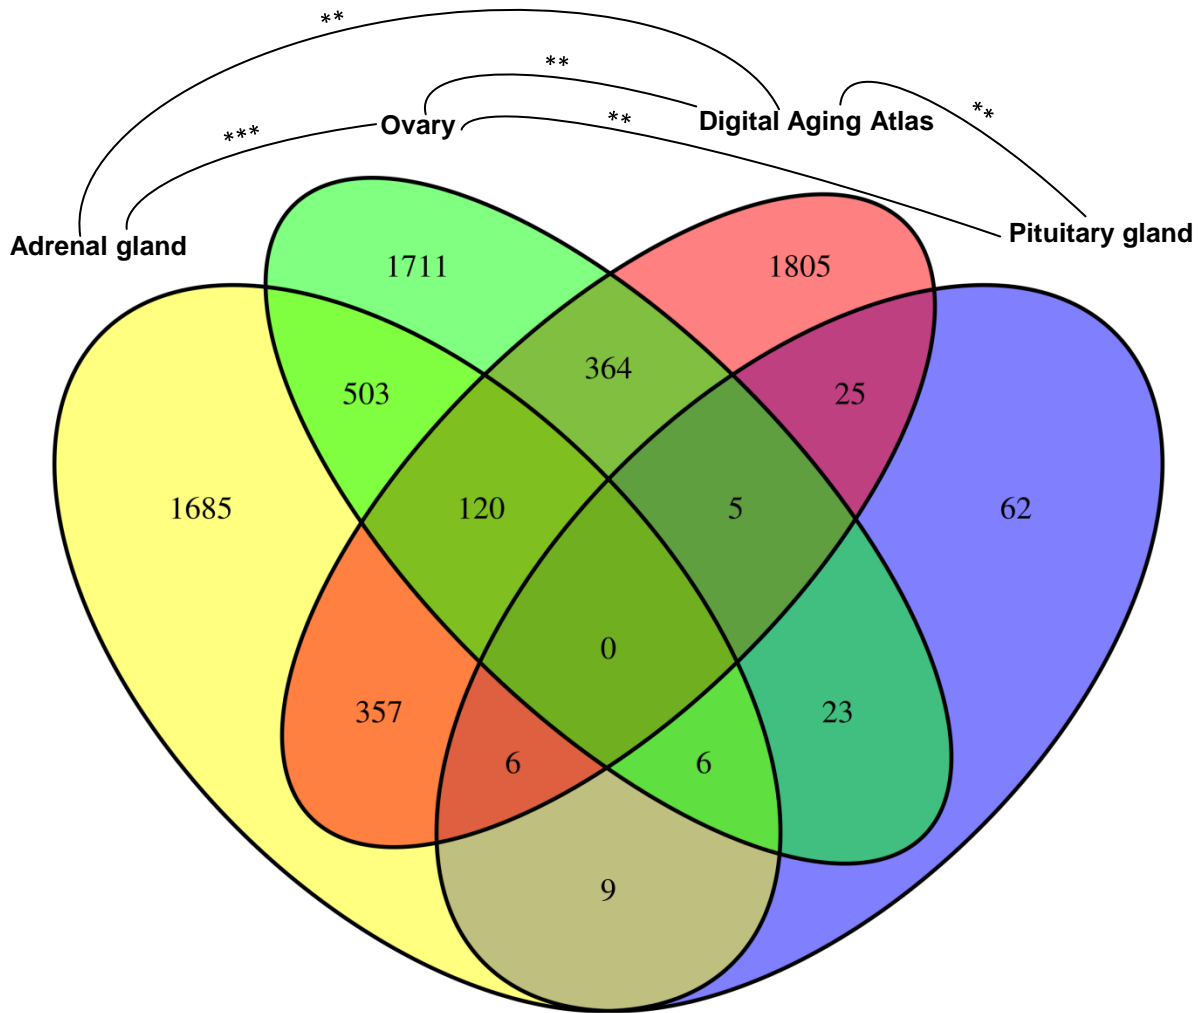**B**

|                 | NMR ♀                 | NMR ♂               | GP ♀                | GP ♂                  |
|-----------------|-----------------------|---------------------|---------------------|-----------------------|
| <b>Same</b>     | 3561                  | 2060                | 2521                | 1352                  |
| <b>Opposite</b> | 2332                  | 1225                | 3305                | 1917                  |
| <b>P-value</b>  | $5.2 \times 10^{-58}$ | $1 \times 10^{-44}$ | $9 \times 10^{-25}$ | $4.7 \times 10^{-23}$ |

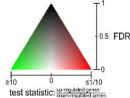

**A**

| Gene                                       | Cross-tissue | Adrenal gland | Blood | Cerebellum | Heart | Hippocampus | Hypothalamus | Kidney | Liver | Muscle | Ovary | Pituitary gland | Salivary gland | Skin  | Spleen | Testis | Thyroid |
|--------------------------------------------|--------------|---------------|-------|------------|-------|-------------|--------------|--------|-------|--------|-------|-----------------|----------------|-------|--------|--------|---------|
| hsa03010 Ribosome                          | 0.900        | 0.900         | 0.548 | 0.902      | 0.593 | 0.500       | 1.008        | 0.500  | 0.177 | 0.523  | 0.207 | 1.000           | 1.000          | 0.501 | 0.500  | 0.500  | 0.500   |
| hsa05016 Huntington's disease              | 0.004        | 0.000         | 0.213 | 0.856      | 0.869 | 1.500       | 1.005        | 0.479  | 0.664 | 0.613  | 0.937 | 0.996           | 1.000          | 0.987 | 0.101  | 0.000  | 0.171   |
| hsa03050 Proteasome                        | 0.504        | 0.500         | 0.593 | 0.557      | 1.000 | 1.500       | 0.815        | 0.993  | 0.981 | 0.155  | 0.333 | 0.996           | 1.000          | 0.983 | 0.264  | 0.500  | 1.500   |
| hsa00140 Steroid hormone biosynthesis      | 0.006        | 1.000         | 0.093 | 0.850      | 0.869 | 1.500       | 0.954        | 0.266  | 0.764 | 0.009  | 0.542 | 0.983           | 0.228          | 0.218 | 0.808  | 1.000  | 1.000   |
| hsa05012 Parkinson's disease               | 0.018        | 0.500         | 0.053 | 0.583      | 1.000 | 0.684       | 1.000        | 0.099  | 0.991 | 0.658  | 0.002 | 0.996           | 1.000          | 0.929 | 0.118  | 0.002  | 0.263   |
| hsa03008 Ribosome biogenesis in eukaryotes | 0.023        | 0.084         | 0.658 | 0.814      | 0.725 | 1.000       | 0.652        | 0.975  | 0.333 | 0.504  | 0.722 | 0.996           | 0.982          | 0.987 | 0.118  | 0.713  | 0.388   |
| hsa04260 Cardiac muscle contraction        | 0.021        | 0.408         | 0.602 | 0.850      | 0.599 | 1.000       | 0.968        | 0.820  | 0.931 | 0.367  | 0.695 | 0.163           | 0.982          | 0.932 | 0.149  | 0.537  | 0.538   |
| hsa05010 Alzheimer's disease               | 0.021        | 0.900         | 0.087 | 0.857      | 0.889 | 1.000       | 0.919        | 0.078  | 0.897 | 0.600  | 0.018 | 0.996           | 0.982          | 0.889 | 0.208  | 0.009  | 0.263   |
| hsa00190 Oxidative phosphorylation         | 0.023        | 0.500         | 0.593 | 0.514      | 0.954 | 1.000       | 1.000        | 0.613  | 0.991 | 0.402  | 0.002 | 0.996           | 1.000          | 0.682 | 0.209  | 0.011  | 0.263   |
| hsa04976 Bile secretion                    | 0.028        | 1.000         | 0.053 | 0.857      | 0.598 | 1.000       | 0.228        | 0.048  | 0.956 | 0.588  | 0.494 | 0.254           | 1.000          | 0.933 | 0.601  | 1.000  | 1.000   |
| hsa00982 Drug metabolism - cytochrome P450 | 0.028        | 1.000         | 0.046 | 0.857      | 0.803 | 1.000       | 0.736        | 0.998  | 0.037 | 0.301  | 0.986 | 0.996           | 0.982          | 0.553 | 0.000  | 0.824  | 1.000   |
| hsa04975 Fat digestion and absorption      | 0.028        | 1.000         | 0.213 | 0.643      | 0.925 | 1.000       | 0.524        | 0.975  | 0.897 | 0.189  | 0.179 | 0.358           | 0.982          | 0.300 | 0.882  | 1.000  | 1.000   |
| hsa03013 RNA transport                     | 0.053        | 0.023         | 0.644 | 0.814      | 0.598 | 1.000       | 1.000        | 0.820  | 0.897 | 0.418  | 0.715 | 0.996           | 1.000          | 0.936 | 0.238  | 0.537  | 0.505   |
| hsa02010 ABC transporters                  | 0.081        | 1.000         | 0.644 | 0.945      | 0.725 | 1.000       | 0.794        | 0.205  | 0.687 | 0.408  | 0.687 | 0.923           | 1.000          | 0.429 | 0.862  | 0.934  | 0.570   |

**B**

| Pathway                                  | Cross-tissue | Adrenal gland | Blood | Cerebellum | Heart | Hippocampus | Hypothalamus | Kidney | Liver | Muscle | Ovary | Pituitary gland | Salivary gland | Skin  | Spleen | Testis | Thyroid |
|------------------------------------------|--------------|---------------|-------|------------|-------|-------------|--------------|--------|-------|--------|-------|-----------------|----------------|-------|--------|--------|---------|
| HALLMARK_MYC_TARGETS_V1                  | 0.000        | 0.006         | 0.027 | 0.956      | 0.011 | 0.863       | 0.989        | 0.165  | 0.030 | 0.670  | 0.030 | 0.843           | 0.936          | 0.478 | 0.907  | 0.060  | 0.617   |
| HALLMARK_XENOBIOTIC_METABOLISM           | 0.000        | 1.000         | 0.000 | 0.956      | 0.225 | 0.863       | 0.382        | 0.165  | 0.050 | 0.025  | 0.050 | 0.408           | 0.408          | 0.039 | 0.000  | 1.000  | 0.956   |
| HALLMARK_OXIDATIVE_PHOSPHORYLATION       | 0.008        | 0.900         | 0.025 | 0.968      | 0.233 | 0.579       | 0.989        | 0.213  | 0.331 | 0.153  | 0.030 | 1.000           | 0.901          | 0.985 | 0.807  | 0.003  | 0.617   |
| HALLMARK_HYPOXIA                         | 0.012        | 0.896         | 0.014 | 0.956      | 0.225 | 0.423       | 0.989        | 0.956  | 0.135 | 0.794  | 0.050 | 0.057           | 0.950          | 0.000 | 0.153  | 1.000  | 0.780   |
| HALLMARK_COAGULATION                     | 0.020        | 1.000         | 0.000 | 0.956      | 0.450 | 0.921       | 0.917        | 0.274  | 0.094 | 0.308  | 0.888 | 0.820           | 0.969          | 0.864 | 0.000  | 1.000  | 0.968   |
| HALLMARK_BILE_ACID_METABOLISM            | 0.025        | 1.000         | 0.025 | 0.956      | 0.418 | 0.370       | 0.989        | 0.539  | 0.322 | 0.039  | 0.487 | 1.000           | 0.243          | 0.980 | 0.807  | 0.835  | 0.617   |
| HALLMARK_MYOGENESIS                      | 0.028        | 1.000         | 0.060 | 0.956      | 0.005 | 0.150       | 0.017        | 0.602  | 0.323 | 0.005  | 0.842 | 0.000           | 0.150          | 0.999 | 0.980  | 0.987  | 0.780   |
| HALLMARK_TNFA_SIGNALING_VIA_NFKB         | 0.028        | 1.000         | 0.002 | 0.956      | 0.546 | 0.423       | 0.989        | 0.970  | 0.165 | 0.286  | 0.180 | 0.146           | 0.950          | 0.909 | 0.807  | 1.000  | 0.885   |
| HALLMARK_ANGIOGENESIS                    | 0.028        | 0.036         | 0.161 | 0.956      | 0.625 | 0.578       | 0.669        | 0.165  | 0.331 | 0.933  | 0.858 | 0.853           | 0.741          | 0.252 | 0.850  | 0.945  | 0.566   |
| HALLMARK_REACTIVE_OXIGEN_SPECIES_PATHWAY | 0.092        | 0.017         | 0.798 | 0.956      | 0.307 | 0.578       | 0.989        | 0.748  | 0.828 | 0.029  | 0.114 | 0.145           | 0.178          | 0.705 | 0.808  | 0.600  | 0.560   |
| HALLMARK_P53_PATHWAY                     | 0.092        | 0.075         | 0.002 | 0.500      | 0.611 | 0.563       | 0.989        | 0.956  | 0.042 | 0.096  | 0.287 | 0.146           | 0.217          | 0.005 | 0.890  | 0.591  | 0.504   |
| HALLMARK_APOPTOSIS                       | 0.092        | 0.127         | 0.258 | 0.956      | 0.641 | 0.587       | 0.668        | 0.956  | 0.313 | 0.887  | 0.950 | 0.050           | 0.784          | 0.001 | 0.153  | 0.712  | 0.617   |
| HALLMARK_PEROXISOME                      | 0.096        | 0.771         | 0.263 | 0.650      | 0.191 | 0.225       | 0.962        | 0.539  | 0.058 | 0.153  | 0.842 | 1.000           | 0.894          | 0.980 | 0.807  | 0.382  | 0.880   |

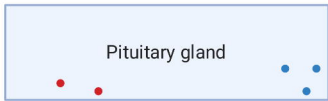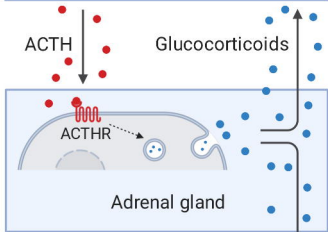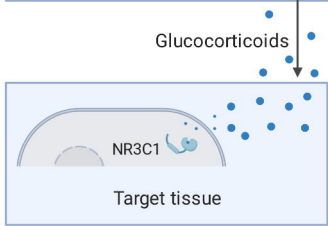

● ACTHR (encoded by *MC2R*) is **up-regulated** in non-breeders

● Cortisol level is **higher** in non-breeders

● NR3C1 target genes are **differentially regulated** in non-breeders

### Symptomes of glucocorticoid excess

- **Weight gain**
- **Loss of bone density**
- **GH-/IGF1 axis impairment**
- **Muscle weakness**
- **Decreased fertility**
- **Immune suppression**
- **Cardiovascular disease**

**A**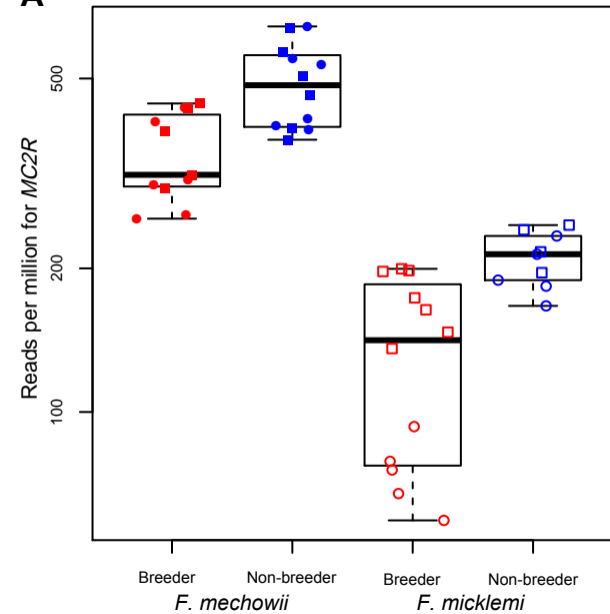**B**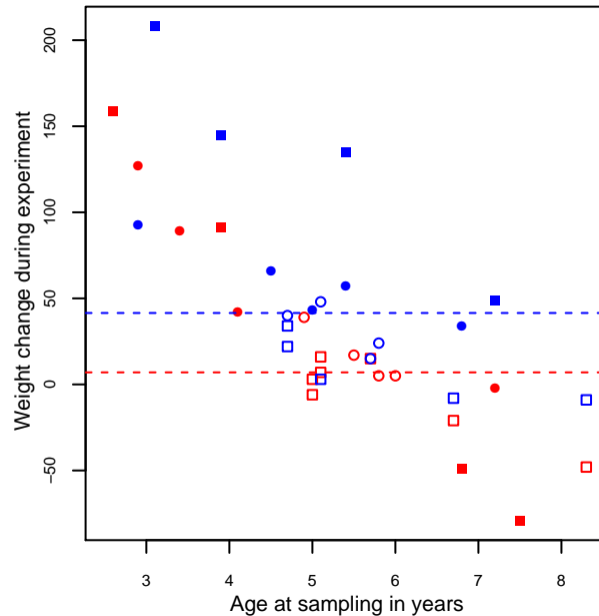**C**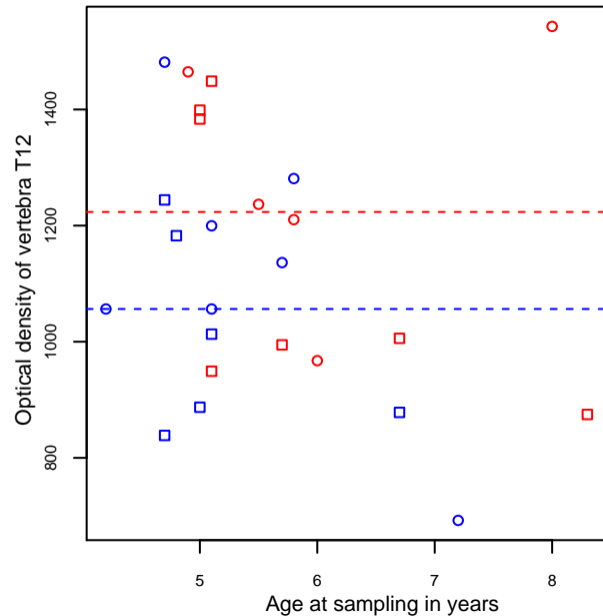

Source: https://www.biorxiv.org/content/10.1101/2020.02.22.961011v1.full.pdf
